# Supplementary material for: Multiscale analysis of pangenomes enables improved representation of genomic diversity for repetitive and clinically relevant genes
Source: PubMed Central journal article supplement (PMC10406601; doi:10.1038/s41592-023-01914-y), 2023-06-26

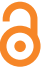

---

# Multiscale analysis of pangenomes enables improved representation of genomic diversity for repetitive and clinically relevant genes

---

In the format provided by the authors and unedited

## Supplementary Material

### Table of Contents

|                                                                                                               |           |
|---------------------------------------------------------------------------------------------------------------|-----------|
| <b>Performance Evaluation</b>                                                                                 | <b>2</b>  |
| Sequence Query                                                                                                | 2         |
| Supplementary Table 1                                                                                         | 2         |
| Supplementary Table 2                                                                                         | 4         |
| Supplementary Table 3                                                                                         | 6         |
| Effect of the Parameter Choice to The MAP Vertex Sizes                                                        | 10        |
| Supplementary Figure 1                                                                                        | 10        |
| Supplementary Table 5                                                                                         | 12        |
| Suggested Parameter Choice for Region of Size Up to 5Mb                                                       | 13        |
| Supplementary Table 6                                                                                         | 13        |
| <br>                                                                                                          |           |
| <b>Generate MAP-Graph and Principal Bundle Decomposition for AMY and MHC regions</b>                          | <b>14</b> |
| Comparing Principal Bundle Decomposition with Different Set of Parameters                                     | 15        |
| Supplementary Figure 2                                                                                        | 17        |
| AMY1A repeat dot plots and principal bundle decomposition plots                                               | 18        |
| Supplementary Figure 3                                                                                        | 18        |
| <br>                                                                                                          |           |
| <b>GIAB CMRG cases</b>                                                                                        | <b>20</b> |
| Supplementary Figure 4                                                                                        | 20        |
| <br>                                                                                                          |           |
| <b>SNTG2 and KMT2</b>                                                                                         | <b>30</b> |
| Supplementary Figure 5                                                                                        | 30        |
| <br>                                                                                                          |           |
| <b>The distribution of the vertex weight on the principal bundle vertices for MHC class II, AMY1A and LPA</b> | <b>32</b> |
| Supplementary Figure 6                                                                                        | 32        |
| <br>                                                                                                          |           |
| <b>LPA, KIV-II repeats principal bundle decomposition plot</b>                                                | <b>33</b> |
| Supplementary Figure 7: LPA, KIV-II repeats principal bundle decomposition plot                               | 33        |
| <br>                                                                                                          |           |
| <b>Principal bundle plot for KATNAL2</b>                                                                      | <b>34</b> |
| Supplementary Figure 8                                                                                        | 34        |

## Performance Evaluation

### Sequence Query

While PGR-TK is not designed for creating sequence alignments, the query sequence to database query provided function to identify homologous sequences in the database to the query sequences. We compare the computing resource for such utility in PGR-TK to minimap2, currently the state of art for fast sequence alignment. For a set of ten selected regions for querying 11 haplotype pangenome references, PGR-TK can index all genome in parallel and provide comparable query time.

### Supplementary Table 1

| Computation Resources     | Tool                                                                                        |               |
|---------------------------|---------------------------------------------------------------------------------------------|---------------|
|                           | pgr-tk                                                                                      | minimap2      |
| index time (elapsed time) | 6 min 43 sec<br>(agc database building =<br>2 min 59 sec<br>and<br>indexing = 2 min 44 sec) | 13 min 07 sec |
| query time                | 8.45 sec (including fetching<br>the sequences)                                              | 17.93 sec     |
| sequence storage          | 807 Mb                                                                                      | 9.0 Gb        |
| index storage             | 2.0 Gb                                                                                      | 75.9 Gb       |

Our testing pangenome dataset contain the assemblies from the HGRP samples:

HG00438.maternal, HG00438.paternal, HG00621.maternal, HG00621.paternal,  
HG00673.maternal, HG00673.paternal, HG00735.maternal, HG00735.paternal,  
HG00741.maternal, HG00741.paternal

minimap2:

source: <https://github.com/lh3/minimap2>

revision: 01b98e8e52a8acfed5a9d57853f028267eaf045f

commands:

Minimap2 index:

```
\time -v ./minimap2/minimap2 HG00438.maternal.f1_assembly_v2_genbank.fa.gz -t 16 -d  
HG00438.maternal.f1_assembly_v2_genbank.fa.gz.idx &>> minimap_timing1.log  
\time -v ./minimap2/minimap2 HG00438.paternal.f1_assembly_v2_genbank.fa.gz -t 16 -d  
HG00438.paternal.f1_assembly_v2_genbank.fa.gz.idx &>> minimap_timing1.log
```

```

\time -v ./minimap2/minimap2 HG00621.maternal.f1_assembly_v2_genbank.fa.gz -t 16 -d
HG00621.maternal.f1_assembly_v2_genbank.fa.gz.idx &> minimap_timing1.log
\time -v ./minimap2/minimap2 HG00621.paternal.f1_assembly_v2_genbank.fa.gz -t 16 -d
HG00621.paternal.f1_assembly_v2_genbank.fa.gz.idx &> minimap_timing1.log
\time -v ./minimap2/minimap2 HG00673.maternal.f1_assembly_v2_genbank.fa.gz -t 16 -d
HG00673.maternal.f1_assembly_v2_genbank.fa.gz.idx &> minimap_timing1.log
\time -v ./minimap2/minimap2 HG00673.paternal.f1_assembly_v2_genbank.fa.gz -t 16 -d
HG00673.paternal.f1_assembly_v2_genbank.fa.gz.idx &> minimap_timing1.log
\time -v ./minimap2/minimap2 HG00735.maternal.f1_assembly_v2_genbank.fa.gz -t 16 -d
HG00735.maternal.f1_assembly_v2_genbank.fa.gz.idx &> minimap_timing1.log
\time -v ./minimap2/minimap2 HG00735.paternal.f1_assembly_v2_genbank.fa.gz -t 16 -d
HG00735.paternal.f1_assembly_v2_genbank.fa.gz.idx &> minimap_timing1.log
\time -v ./minimap2/minimap2 HG00741.maternal.f1_assembly_v2_genbank.fa.gz -t 16 -d
HG00741.maternal.f1_assembly_v2_genbank.fa.gz.idx &> minimap_timing1.log
\time -v ./minimap2/minimap2 HG00741.paternal.f1_assembly_v2_genbank.fa.gz -t 16 -d
HG00741.paternal.f1_assembly_v2_genbank.fa.gz.idx &> minimap_timing1.log
\time -v ./minimap2/minimap2 chm13.draft_v1.1.fasta.gz -t 16 -d chm13.draft_v1.1.fasta.gz.idx
&> minimap_timing1.log

```

### Minimap2 query:

```

cat << EOF | \time -v parallel -j 16 2> minimap_timing.log 1> minimap.hits
./minimap2/minimap2 -x asm5 HG00438.maternal.f1_assembly_v2_genbank.fa.gz.idx ROI_seq.fa
./minimap2/minimap2 -x asm5 HG00438.paternal.f1_assembly_v2_genbank.fa.gz.idx ROI_seq.fa
./minimap2/minimap2 -x asm5 HG00621.maternal.f1_assembly_v2_genbank.fa.gz.idx ROI_seq.fa
./minimap2/minimap2 -x asm5 HG00621.paternal.f1_assembly_v2_genbank.fa.gz.idx ROI_seq.fa
./minimap2/minimap2 -x asm5 HG00673.maternal.f1_assembly_v2_genbank.fa.gz.idx ROI_seq.fa
./minimap2/minimap2 -x asm5 HG00673.paternal.f1_assembly_v2_genbank.fa.gz.idx ROI_seq.fa
./minimap2/minimap2 -x asm5 HG00735.maternal.f1_assembly_v2_genbank.fa.gz.idx ROI_seq.fa
./minimap2/minimap2 -x asm5 HG00735.paternal.f1_assembly_v2_genbank.fa.gz.idx ROI_seq.fa
./minimap2/minimap2 -x asm5 HG00741.maternal.f1_assembly_v2_genbank.fa.gz.idx ROI_seq.fa
./minimap2/minimap2 -x asm5 HG00741.paternal.f1_assembly_v2_genbank.fa.gz.idx ROI_seq.fa
./minimap2/minimap2 -x asm5 chm13.draft_v1.1.fasta.gz.idx ROI_seq.fa
EOF

```

### pgr-tk:

revision: 75fa20b41592941c9e6eef3f914d97788ee06b86

### commands:

```

ls *.fa.gz > agc_inputs
\time -v ~/benchmark/pgr-tk/agc/agc create chm13.draft_v1.1.fasta.gz -i agc_inputs >
test.agc 2>> timing.log
echo test.agc > pgr_input
\time -v pgr-mdb pgr_input test 2>> timing.log
\time -v pgr-query test ROI_seq.fa pgr-query-out 2> pgr-query-out.log

```

Here is the list of the testing query sequences:

| Regions of interest for testing querying |           |           |       |     |        |
|------------------------------------------|-----------|-----------|-------|-----|--------|
| Name                                     | Reference | Chromosom | begin | end | Strand |
|                                          |           |           |       |     |        |

|        |        |       |           |           |   |
|--------|--------|-------|-----------|-----------|---|
| MHC-C2 | GRCh38 | chr6  | 32313513  | 32992088  |   |
| RCCE   | GRCh38 | chr6  | 31976719  | 32117146  | 0 |
| AMY    | GRRh38 | chr1  | 103542345 | 103798299 | 0 |
| LPA    | GRRh38 | chr6  | 160529904 | 160666180 | 0 |
| IGH    | GRRh38 | chr14 | 106205008 | 106874830 | 0 |
| HLA-CB | GRRh38 | chr6  | 31143427  | 31484914  | 0 |
| ABO    | GRRh38 | chr9  | 133163441 | 133361030 | 0 |
| TSPY1  | GRRh38 | chrY  | 9294496   | 9591276   | 0 |
| 15q15  | GRRh38 | chr15 | 43531685  | 43769928  | 0 |
| 16p21  | GRRh38 | chr16 | 28139916  | 28830868  | 0 |

## Supplementary Table 2

We compared the query results for two selected regions and found them to be consistent. In these two cases, due to differences in their design, the "pgr-query" command only produced a single aligned region for each reference assembly, rather than multiple supplementary alignments. Similar to minimap2, "pgr-query" provides additional information about the hits, allowing the user to apply filters and define criteria to eliminate false positive alignments caused by repeats in more complex scenarios.

|                             | pgr-query results |          | minimap2 results |          | consistent |
|-----------------------------|-------------------|----------|------------------|----------|------------|
|                             | begin             | end      | begin            | end      |            |
| MHC Class 2                 |                   |          |                  |          |            |
| HG00438#1#JAHBCB010000040.1 | 23357242          | 24010477 | 23356506         | 24011428 | Yes        |
| HG00438#2#JAHBCA010000042.1 | 23362233          | 24141470 | 23361497         | 24142421 | Yes        |
| HG00621#1#JAHBCD010000020.1 | 23356282          | 24115439 | 23352369         | 24116390 | Yes        |
| HG00621#2#JAHBCC010000005.1 | 32265868          | 32906962 | 32264542         | 32910924 | Yes        |
| HG00673#1#JAHBBZ010000030.1 | 32179011          | 32823596 | 32177436         | 32824276 | Yes        |
| HG00673#2#JAHBBY010000031.1 | 886239            | 1474176  | 884899           | 1475258  | Yes        |
| HG00735#1#JAHBCH010000013.1 | 32366232          | 33038084 | 32364489         | 33042050 | Yes        |
| HG00735#2#JAHBCG010000038.1 | 3651996           | 4413560  | 3650989          | 4414240  | Yes        |
| HG00741#1#JAHALY010000025.1 | 23365046          | 24008887 | 23363908         | 24010574 | Yes        |
| HG00741#2#JAHALX010000077.1 | 25645945          | 26293199 | 25644213         | 26294150 | Yes        |
| chm13 chr6                  | 32168394          | 32812380 | 32166819         | 32813462 | Yes        |

|                             |           |           |           |           |     |
|-----------------------------|-----------|-----------|-----------|-----------|-----|
|                             |           |           |           |           |     |
|                             |           |           |           |           |     |
| AMY                         |           |           |           |           |     |
| HG00438#1#JAHBCB010000015.1 | 33562835  | 33889251  | 33561142  | 33889429  | Yes |
|                             |           |           | 33657228  | 33801412  |     |
|                             |           |           | 33761202  | 33865960  |     |
| HG00438#2#JAHBCA010000012.1 | 51600987  | 51760853  | 51599294  | 51761031  | Yes |
|                             |           |           | 51611167  | 51668018  |     |
|                             |           |           | 51663126  | 51695258  |     |
|                             |           |           | 51695374  | 51737568  |     |
| HG00621#1#JAHBCD010000034.1 | 2187959   | 2536123   | 2187725   | 2537760   | Yes |
|                             |           |           | 2211188   | 2315970   |     |
|                             |           |           | 2253384   | 2410116   |     |
|                             |           |           | 2469036   | 2509286   |     |
| HG00621#2#JAHBCC010000031.1 | 16758012  | 17011992  | 16756319  | 17012170  | Yes |
| HG00673#1#JAHBBZ010000075.1 | 16748192  | 16908034  | 16746499  | 16908212  | Yes |
|                             |           |           | 16758372  | 16815202  |     |
|                             |           |           | 16810310  | 16842663  |     |
|                             |           |           | 16842559  | 16884745  |     |
| HG00673#1#JAHBBZ010000329.1 | 312       | 93447     | 22834     | 50859     |     |
|                             |           |           | 22920     | 48155     |     |
|                             |           |           | 22930     | 48307     |     |
|                             |           |           | 24483     | 94099     |     |
|                             |           |           | 8         | 87032     |     |
| HG00673#2#JAHBBY010000109.1 | 16763372  | 17111516  | 16761679  | 17111694  | Yes |
| HG00735#1#JAHBCH010000004.1 | 101636258 | 101890244 | 101634565 | 101890422 | Yes |
| HG00735#2#JAHBCG010000068.1 | 4817143   | 4977006   | 4815450   | 4977184   | Yes |
|                             |           |           | 4827323   | 4884173   |     |
|                             |           |           | 4879281   | 4911562   |     |
|                             |           |           | 4911529   | 4953720   |     |
| HG00741#1#JAHALY010000007.1 | 18847041  | 19219687  | 18846807  | 19221324  | Yes |

|                             |           |           |           |           |     |
|-----------------------------|-----------|-----------|-----------|-----------|-----|
|                             |           |           | 18931609  | 19009465  |     |
|                             |           |           | 19037277  | 19125244  |     |
| HG00741#2#JAHALX010000013.1 | 51662338  | 51916331  | 51660645  | 51916509  | Yes |
|                             |           |           | 51672517  | 51729368  |     |
|                             |           |           | 51756716  | 51850848  |     |
|                             |           |           | 51802317  | 51893042  |     |
| chm13:chr1                  | 103392985 | 103835251 | 103391292 | 103835429 |     |
|                             |           |           | 103680709 | 103699433 |     |

### Supplementary Table 3

In **Supplementary Table 3**, we compared the results of the pgr-query and minimap2 for a test set of pangenomic sequences. While pgr-query is designed to fetch homologous sequences from the database using long query sequences, rather than as a general sequence aligner, it is important to demonstrate its performance in fetching sequences accurately. We compared all hits larger than 10 kb from the pgr-query output for a set of 395 query sequences from the CMRG to the minimap2 output and found that the results are highly consistent in most cases. Some discrepancies are due to (1) short hits and (2) low minimap2 mapQV output. The pgr-query output might be more sensitive, such that some repetitive sequences are in the query output without proper filtering.

**Supplementary Table 3a**, we compare the unfiltered pgq-query output and the filtered output with hits that has more than 5 minimizer anchors found with the minimap2 output unfiltered or filtered by MapQV. Based on the hits from minimap2, pgr-query captures 97% to 99% hits, depending on the filtering criteria.

|                                      | Minimap2 (All) | Minimap2 (MapQV > 30) |
|--------------------------------------|----------------|-----------------------|
| minimap2 hits                        | 3668           | 3190                  |
| overlapped pgr-query hits (filtered) | 3601           | 3164                  |
| 80% overlapped percentage            | 98.17%         | 99.18%                |
| overlapped pgr-query hits (filtered) | 3573           | 3164                  |
| 80% overlapped percentage            | 97.41%         | 99.18%                |

**Supplementary Table 3b**, Base on the hit output from pgr-query, minimap2 capture 85% to 94% hits, depending on filtering criteria.

|                                     | unfiltered | filtered |
|-------------------------------------|------------|----------|
| pgr-query hits                      | 3637       | 3589     |
| overlapped minimap2 hits            | 3397       | 3396     |
| 80% overlapped percentage           | 93.40%     | 94.62%   |
| overlapped minimap2 hits (MapQV>30) | 3104       | 3103     |
| 80% overlapped percentage           | 85.35%     | 86.46%   |

**Supplementary Table 3c**, Pangenome Graph Construction Comparison. The measure resource usage for making index with different parameters.

| Data: 97 haplotype human genome assembly |    |    |                      |                       |                         |                     |                       |  |
|------------------------------------------|----|----|----------------------|-----------------------|-------------------------|---------------------|-----------------------|--|
| w                                        | k  | r  | Index file size (Gb) | elapse time (min:sec) | User Space CPU time (s) | System CPU time (s) | Memory Usage (Kbytes) |  |
| 80                                       | 56 | 12 | 3                    | 13:11.09              | 10749                   | 455                 | 35605852              |  |
| 80                                       | 56 | 8  | 6.1                  | 14:21.31              | 10865                   | 462                 | 41329332              |  |
| 80                                       | 56 | 6  | 9.5                  | 15:50.63              | 10966                   | 472                 | 48986112              |  |
| 80                                       | 56 | 4  | 15                   | 18:26.03              | 11171                   | 488                 | 61270196              |  |
| 80                                       | 48 | 4  | 15                   | 18:10.64              | 11159                   | 485                 | 59441552              |  |
| 80                                       | 32 | 4  | 15                   | 17:58.06              | 11129                   | 484                 | 59576876              |  |
| 80                                       | 24 | 4  | 15                   | 17:47.83              | 11139                   | 482                 | 59178764              |  |
| 64                                       | 56 | 4  | 17                   | 19:13.54              | 11393                   | 517                 | 65174852              |  |
| 48                                       | 56 | 4  | 18                   | 20:14.21              | 11685                   | 543                 | 70309960              |  |

command:

```
echo /wd/data/pgr-tk-HGRP-y1-evaluation-set-v0.agc > input
```

```
\time -v pgr-mdb -r 4 input pgr-tk-HGRP-y1-evaluation-set-v0-r4 >& log_r4
\time -v pgr-mdb -r 6 input pgr-tk-HGRP-y1-evaluation-set-v0-r6 >& log_r6
\time -v pgr-mdb -r 8 input pgr-tk-HGRP-y1-evaluation-set-v0-r8 >& log_r8
```



```

\time -v pgr-mdb -r 12 input pgr-tk-HGRP-y1-evaluation-set-v0-r12 >& log_r12

\time -v pgr-mdb -k 48 input pgr-tk-HGRP-y1-evaluation-set-v0-k48 >& log_k48
\time -v pgr-mdb -k 32 input pgr-tk-HGRP-y1-evaluation-set-v0-k32 >& log_k32
\time -v pgr-mdb -k 24 input pgr-tk-HGRP-y1-evaluation-set-v0-k24 >& log_k24

\time -v pgr-mdb -w 64 input pgr-tk-HGRP-y1-evaluation-set-v0-w64 >& log_w64
\time -v pgr-mdb -w 48 input pgr-tk-HGRP-y1-evaluation-set-v0-w48 >& log_w48

```

#### Supplementary Table 4

Comparison of graph build time to seqwish and minigraph (input sequence data HLA Class II sequence from the 97 pangnome references)

| Tool             | Command Line                                                                            | User time (seconds) | System time (seconds) | Elapsed (wall clock) time (min:sec) | memory usage (kb) |
|------------------|-----------------------------------------------------------------------------------------|---------------------|-----------------------|-------------------------------------|-------------------|
| <b>seqwish</b>   |                                                                                         |                     |                       |                                     |                   |
| command          | wfmash HLA-ClassII_seq.fa<br>HLA-ClassII_seq.fa -t 32<br>-X                             | 5270.32             | 4.39                  | 3:09.82                             | 878516            |
| command          | seqwish -s HLA-<br>ClassII_seq.fa -p HLA-<br>ClassII_seq.paf -g HLA-<br>ClassII_seq.gfa | 74.26               | 4.37                  | 0:29.22                             | 1619660           |
| <b>minigraph</b> |                                                                                         |                     |                       |                                     |                   |
| command          | minigraph -t 32 -cxggs<br>chm13_HLA_C2.fa MHC*.fa ><br>out.gfa                          | 799.91              | 41.2                  | 13:19.61                            | 2273760           |
| <b>pgr-tk</b>    |                                                                                         |                     |                       |                                     |                   |
| command          | pgr-pbundle-decomp HLA-<br>ClassII_seq.fa HLA-<br>ClassII                               | 10.63               | 1.2                   | 0:04.32                             | 466448            |
| command          | pgr-pbundle-decomp -r 3<br>HLA-ClassII_seq.fa HLA-<br>ClassII_r3                        | 12.51               | 1.32                  | 0:05.46                             | 661628            |
| command          | pgr-pbundle-decomp -r 1<br>HLA-ClassII_seq.fa HLA-<br>ClassII_r1                        | 19.71               | 3.94                  | 0:11.39                             | 1294248           |

| Tool             | Command Line                                                                | number of vertices | number of edges | average vertex size (bp) | (Graph base length) / (total sequence length) |
|------------------|-----------------------------------------------------------------------------|--------------------|-----------------|--------------------------|-----------------------------------------------|
| <b>seqwish</b>   |                                                                             |                    |                 |                          |                                               |
| command          | wfmash HLA-ClassII_seq.fa HLA-ClassII_seq.fa -t 32 -X                       |                    |                 |                          |                                               |
| command          | seqwish -s HLA-ClassII_seq.fa -p HLA-ClassII_seq.paf -g HLA-ClassII_seq.gfa | 121061             | 196640          | 122.4                    | 0.1785                                        |
| <b>minigraph</b> |                                                                             |                    |                 |                          |                                               |
| command          | minigraph -t 32 -cxggs chm13_HLA_C2.fa MHC*.fa > out.gfa                    | 293                | 409             | 3140.6                   | 0.0111                                        |
| <b>pgr-tk</b>    |                                                                             |                    |                 |                          |                                               |
| command          | pgr-pbundle-decomp HLA-ClassII_seq.fa HLA-ClassII                           | 18258              | 29830           | 310.458                  | 0.0683                                        |
| command          | pgr-pbundle-decomp -r 3 HLA-ClassII_seq.fa HLA-ClassII_r3                   | 25274              | 40969           | 233.776                  | 0.0712                                        |
| command          | pgr-pbundle-decomp -r 1 HLA-ClassII_seq.fa HLA-ClassII_r1                   | 50773              | 80572           | 129.932                  | 0.0795                                        |

#### Software versions used

seqwish:

source: <https://github.com/ekg/seqwish.gi>

revision: f362f6f5ea89dbb6a0072a8b8ba215e663301d33

minigraph

source: <https://github.com/lh3/minigraph>

revision: 3398263be225ba923140a1081b505b71f2cdf8fb

pgr-pbundle-decomp (part of PGR-TK)

revision: 75fa20b41592941c9e6eef3f914d97788ee06b86

The test sequence file "HLA-ClassII\_seq.fa" comprises 147 sequences with an average length of 564,570 base pairs. It is important to note that not all sequences were incorporated in the Minigraph output as certain MHC Class II sequences displayed significant divergence from the CHM13 MHC Class II reference. The ratio of the total number of bases in the Minigraph output to the total number of bases in the input sequence file was observed to be significantly lower compared to the results produced by Seqwish and PGR-TK. The Seqwish graph was denser than the MAP-graph generated by `pgr-pbundle-decomp` and provided more detailed information that could be utilized for the direct identification of base-level differences.

On the other hand, PGR-TK demonstrated a significant advantage in terms of computational efficiency, with a construction time of the pangenome graphs that was 500x faster in terms of user CPU time and 60x faster in terms of wall clock time compared to Seqwish, and 75x faster and 160x faster, respectively, compared to Minigraph using default `pgr-pbundle-decomp` parameters.

### **Effect of the Parameter Choice to The MAP Vertex Sizes**

#### **Supplementary Figure 1**

Vertex Sizes of the Chromosome 1 of Chm13 with different  $w$  and  $r$ , ( $\text{min\_span} = 64$ ).

**Supplementary Figure 1a:** the vertex size influences the resolution of the sequence being analyzed. Observing the vertex size distributions using various parameter sets, a flat region is observed followed by an exponential tail. To effectively query the database, it's best to ensure

that the query sequence length is a multiple of the average vertex size.

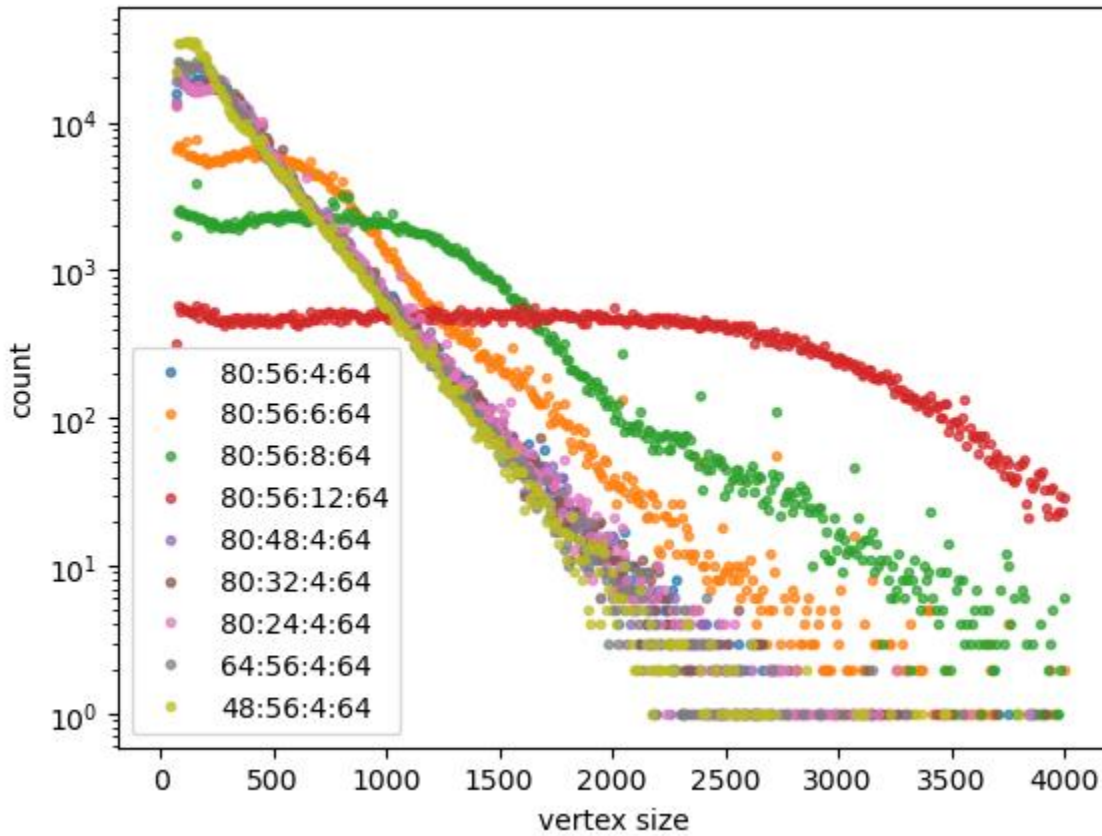

**Supplementary Figure 1b:** this vertex size distribution plot with the same parameter sets as those in **1a**, but with a small `min_span`. To reduce excessing minimizer in long simple repeat regions, we remove all pairs of minimizer anchors that are smaller than `min_span` to reduce unnecessary additional computation resources for processing simple repeat regions.

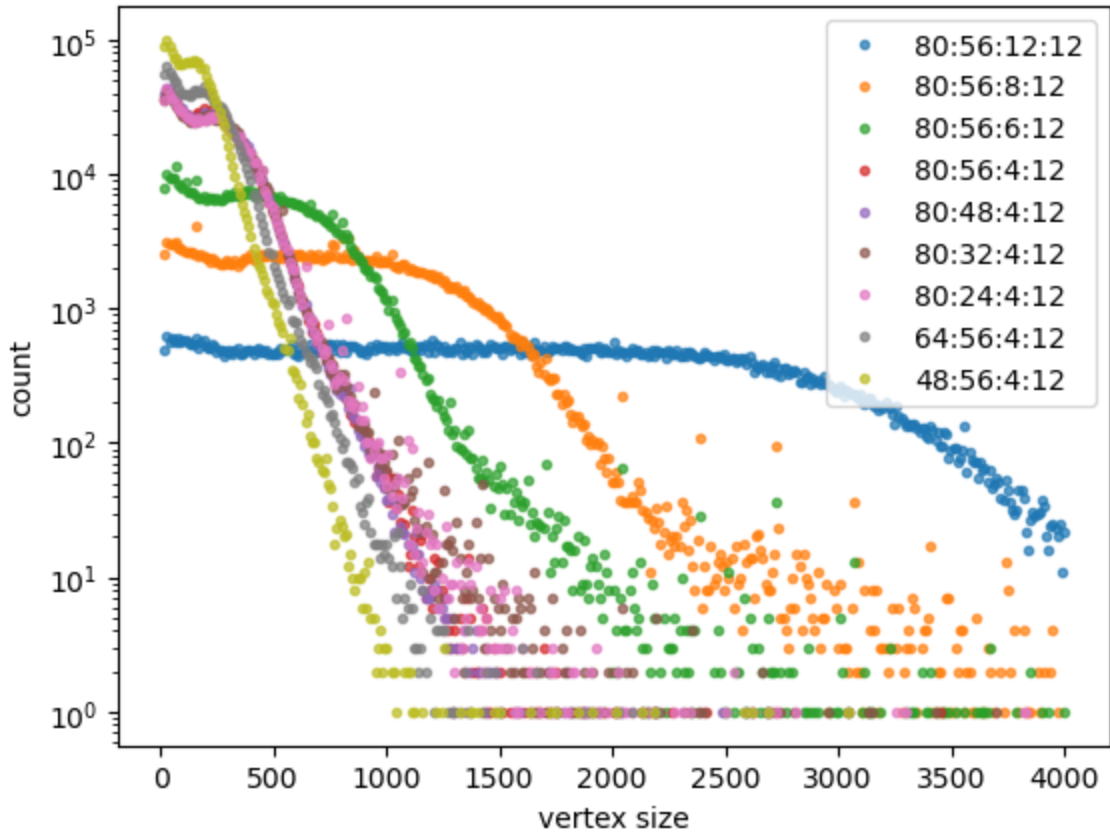

**Supplementary Table 5**

The descriptive statistics from the different set of parameter choice.

| parameter set (w:k:r:m) | total vertex | media size | mean size | standard deviation | 99.9%  | 99.0% |
|-------------------------|--------------|------------|-----------|--------------------|--------|-------|
| 80:56:12:64             | 146967       | 1574       | 1690.1    | 1551.1             | 148956 | 24605 |
| 80:56:8:64              | 309494       | 754        | 802.6     | 519.4              | 7821   | 3388  |
| 80:56:6:64              | 484243       | 462        | 512.9     | 338.5              | 3551   | 2202  |
| 80:56:4:64              | 759890       | 269        | 326.9     | 235.0              | 2283   | 1600  |
| 80:48:4:64              | 756118       | 272        | 328.5     | 234.9              | 2248   | 1583  |
| 80:32:4:64              | 748297       | 275        | 331.9     | 237.4              | 2404   | 1620  |
| 80:24:4:64              | 742768       | 277        | 334.4     | 240.8              | 2349   | 1623  |
| 64:56:4:64              | 831991       | 236        | 298.5     | 221.4              | 2146   | 1515  |
| 48:56:4:64              | 903455       | 202        | 274.9     | 216.7              | 2124   | 1483  |

|             |         |      |        |        |        |       |
|-------------|---------|------|--------|--------|--------|-------|
| 80:56:12:12 | 153192  | 1518 | 1621.4 | 1505.4 | 148956 | 23945 |
| 80:56:8:12  | 341088  | 695  | 728.2  | 484.5  | 7655   | 2841  |
| 80:56:6:12  | 583065  | 398  | 426.0  | 287.9  | 3003   | 1588  |
| 80:56:4:12  | 1159085 | 195  | 214.3  | 148.7  | 1204   | 822   |
| 80:48:4:12  | 1165335 | 196  | 213.1  | 148.5  | 1125   | 809   |
| 80:32:4:12  | 1132410 | 201  | 219.3  | 154.9  | 1620   | 930   |
| 80:24:4:12  | 1138924 | 200  | 218.1  | 154.2  | 1370   | 895   |
| 64:56:4:12  | 1402189 | 162  | 177.1  | 122.0  | 1000   | 688   |
| 48:56:4:12  | 1779213 | 128  | 139.6  | 95.4   | 777    | 558   |

### Suggested Parameter Choice for Region of Size Up to 5Mb

Based on our observations in **Supplementary Table 4**, the parameter  $r$  has the greatest impact on the size of the vertices. To simplify the process, we recommend using the default values of  $w=48$ ,  $k=56$ , and  $\text{min\_span}=12$  for general cases and adjusting the value of  $r$  based on the length of the sequence of interest. This approach can serve as a starting point and can be fine-tuned if specific detailed features are of interest.

### Supplementary Table 6

$w=48$ ,  $k=56$ ,  $\text{min\_span}=12$

$r = \text{floor}(\text{min}(12, \text{max}(2, \text{floor}(2 * (\text{mean}(\text{sequence lengths})/50000)^{0.5}))))$

According to the formula, here is a table for the choice of  $r$  of different lengths of the sequences of interest:

| sequence length(bp) | $r$ |
|---------------------|-----|
| 20,000              | 2   |
| 40,000              | 2   |
| 80,000              | 4   |
| 160,000             | 5   |
| 320,000             | 8   |

|           |    |
|-----------|----|
| 640,000   | 11 |
| 1,280,000 | 12 |
| 2,560,000 | 12 |
| 5,120,000 | 12 |

## Generate MAP-Graph and Principal Bundle Decomposition for AMY and MHC regions

We use GRCh38 chr6:32,313,513-32,992,088 (for MHC Class II) and GRCh38 chr1:103,542,345-103,798,299 as the query sequences to find the homologous sequences in the pangenome reference database (pgr-tk-HGRP-y1-evaluation-set-v0):

```
cat << EOF | tr " " "\t" > regions_interest
MHC-C2 hg38_tagged.fa chr6_hg38 32313513 32992088
AMY hg38_tagged.fa chr1_hg38 103542345 103798299 0
EOF
```

We use the pgr-fetch-seqs command in PGR-TK to get the two references:

```
pgr-fetch-seqs pgr-tk-HGRP-y1-evaluation-set-v0 \
-r regions_interest > ROI_seq.fa
```

Then, we use the pgr-query command to get the sequences in the pangenome reference. We merge the hits that are less than 100kb apart from each other:

```
pgr-query /wd/data/pgr-tk-HGRP-y1-evaluation-set-v0 \
/wd/results/pgr-out/ROI_seq.fa /wd/results/pgr-out/pg_seqs --merge-range-to1 100000
```

After fetching the sequence in the database, we filter out partial aligned contigs. Within the aligned contig, we generate the MAP-graph and the principal bundle decomposition by

```
pgr-pbundle-decomp -w ${w} -k ${k} -r ${r} \
--min-span ${m} --bundle-length-cutoff 100 --min-branch-size 8 \
${fasta_file} /wd/results/pgr-out/${prefix}
```

For MHC class II, we choose  $w=48$ ,  $k=56$ ,  $r=7$ ,  $m=12$ , and for AMY1A, we choose  $w=48$ ,  $k=56$ ,  $r=4$ ,  $m=12$  determined by the formula above.

The command pgr-pbundle-decomp generated the MAP-graph as gfa file and the principal bundle decomposition in bed format. For example, the first five bundles of Chm13 of the AMY1A region are represented as

```
chm13_tagged::chr1_chm13_103392985_103835251_0 174 27484 1:203:0:10:202:U
chm13_tagged::chr1_chm13_103392985_103835251_0 27428 27631 16:2:0:0:1:U
chm13_tagged::chr1_chm13_103392985_103835251_0 27575 50412 2:161:0:0:160:R
```

```
chm13_tagged::chr1_chm13_103392985_103835251_0 50356 51227 10:6:0:0:5:R
chm13_tagged::chr1_chm13_103392985_103835251_0 51171 55089 8:26:0:0:25:R
```

PGR-TK provides a command line tool for quick all pair-wise sparse alignment and compute distances between all pairwise sequences. With the distance we can perform hierarchical clustering to group bundles with similar structures for analysis or visualization. For example, the following command computes the distance based on the principal bundle decomposition

```
pgr-pbundle-bed2dist ${bed_file} ${prefix}
```

It generates three files:

```
${prefix}.dist # this file contains the distances between sequences
${prefix}.nwk # the clustering tree in Newick format
${prefix}.ddg # the file contains the dendrogram information for plotting a clustering
               # tree alone with the principal bundle decomposition with the command
               # pgr-pbundle-bed2svg
```

We can generate the principal decomposition plot with the command `pgr-pbundle-bed2svg`. For example, with the follow, we can generate a principal decomposition plot (`${prefix}.svg`) with the clustering dendrogram with annotation specified by a file `${prefix}.ord`:

```
pgr-pbundle-bed2svg ${bed_file} ${prefix} \
  --track-range 250000 --track-tick-interval 10000
  --track-panel-width 1200 --stroke-width 1.2 \
  --annotations ${prefix}.ord \
  --ddg-file ${prefix}.ddg"
```

Please see more concrete examples in the git repo: <https://github.com/GeneDx/pgr-tk>

### Comparing Principal Bundle Decomposition with Different Set of Parameters

We provide two illustrations of principal bundle decompositions, each with varying scales by changing the parameter sets. The first illustration, shown in Supplementary Figures 3a and 3b, pertains to a 130 kb region of interest containing the LPA KIV-II repeats. The second illustration, also shown in Supplementary Figures 3c and 3d, is of a 2.85 Mbp region located on chromosome 7 from positions 72752602 to 75600937 on GRCh38. This region is known to contain a microdeletion caused by nested repeats, which results in Williams-Beuren syndrome.

In **Supplementary Figure 2a**, there are 231 bundle segments spanning the 103,538 bp CHM13 LPA sequence, while only 93 bundle segments are present in **Supplementary Figure 2b**. The sparser decomposition with  $r=12$  in **Supplementary Figure 2b** for this region may not provide sufficient detail for analyzing repeat elements in the sequences



In contrast, for the large 2.85 Mbp region, the choice  $r=12$  provides a better representation of the overall structure (**Supplementary Figure 2c**), as it contains only 251 bundle segments out of the 2,916,749 bp chromosome 13 sequence, compared to the  $r=6$  choice (**Supplementary Figure 2d**), which has 685 bundle segments. The higher number of bundle segments in the  $r=6$  choice results in over-fragmentation of the sequences, making it more difficult to identify interesting repeats.

The `pgr-pbundle-decomp` command-line tool generates a summary of all contigs, providing valuable information for analysis by reporting the total number and average lengths of repetitive and non-repetitive fragments. This information can help the user make informed decisions if the default parameters suggested in **Supplementary Table 6** do not capture the desired features when comparing pangenome sequences.

## Supplementary Figure 2

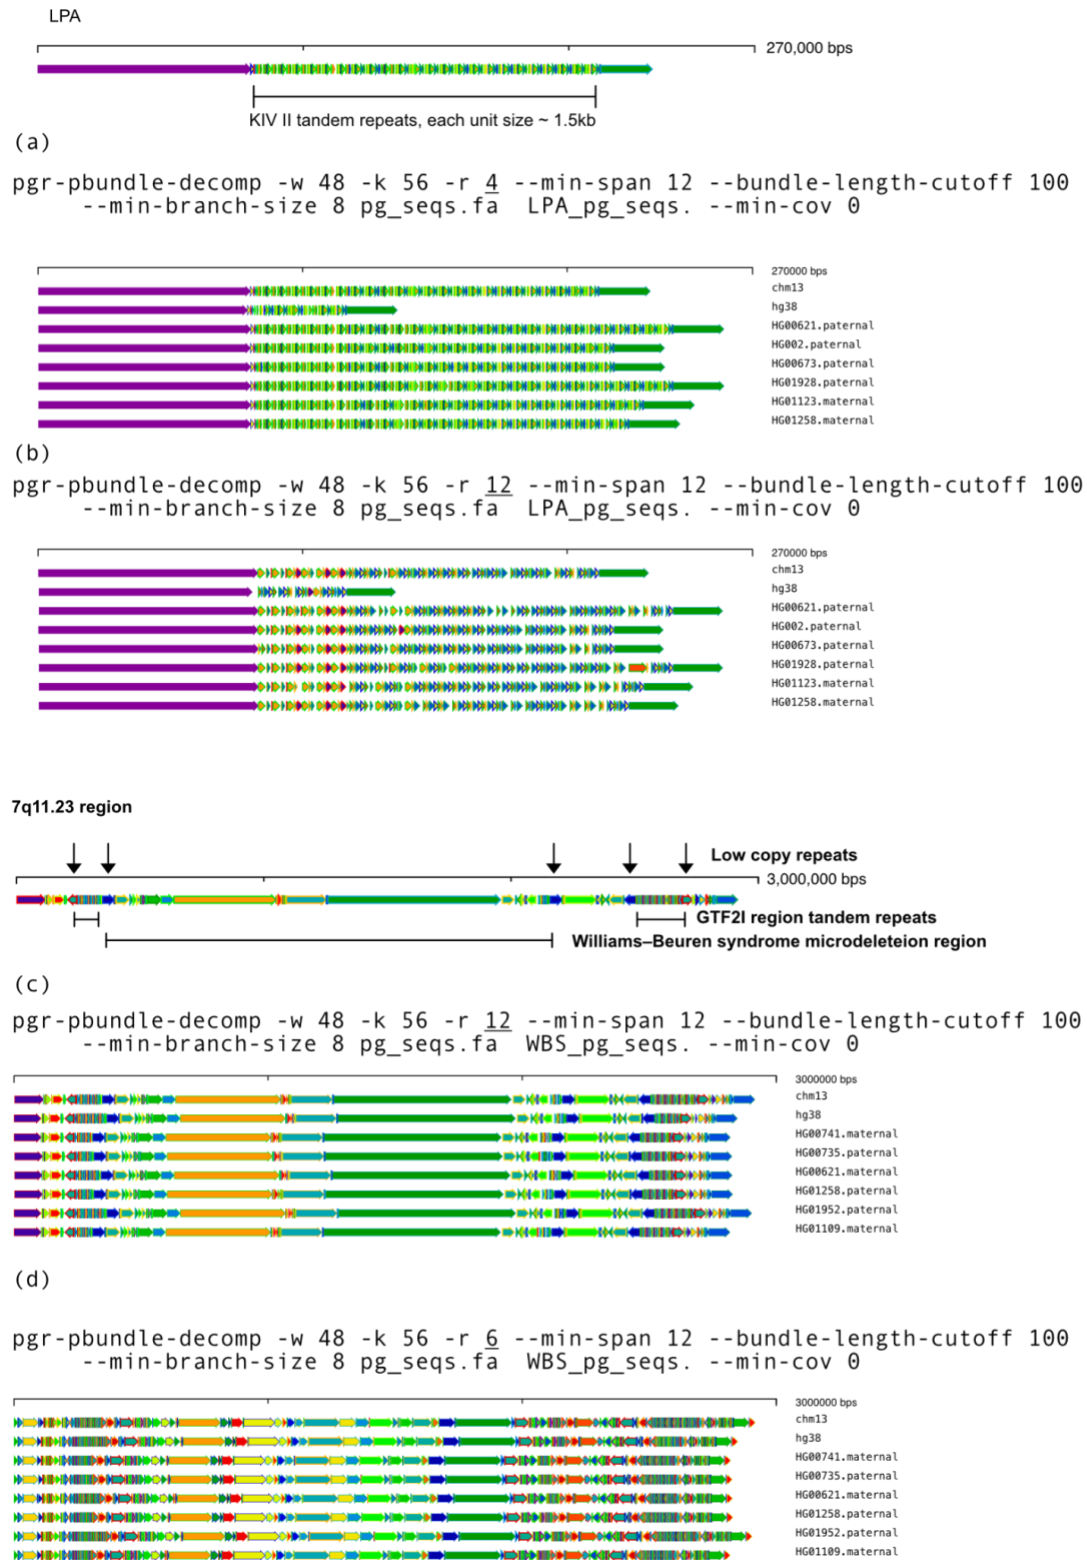

## AMY1A repeat dot plots and principal bundle decomposition plots

### Supplementary Figure 3

### Supplementary Figure 3a

## AMY1A repeat dot plots and principal bundle decomposition plots

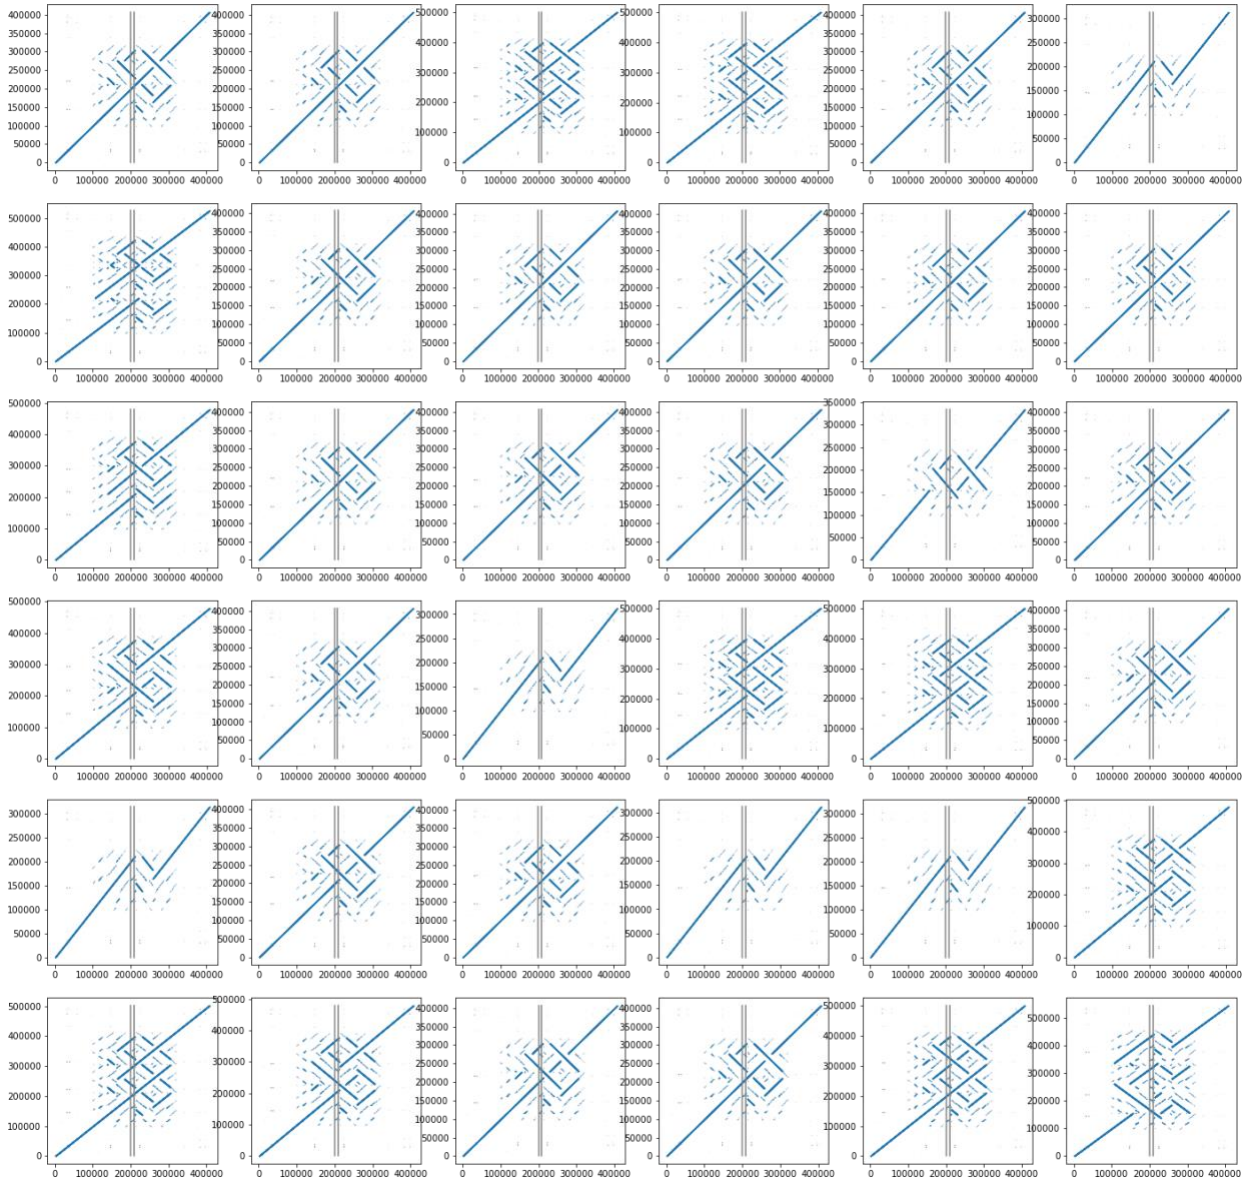

**Supplementary Figure 3b:** The principal bundle plots of the AMY1A repeat regions. The black short bars indicate the regions homologous to AMY1A sequence.

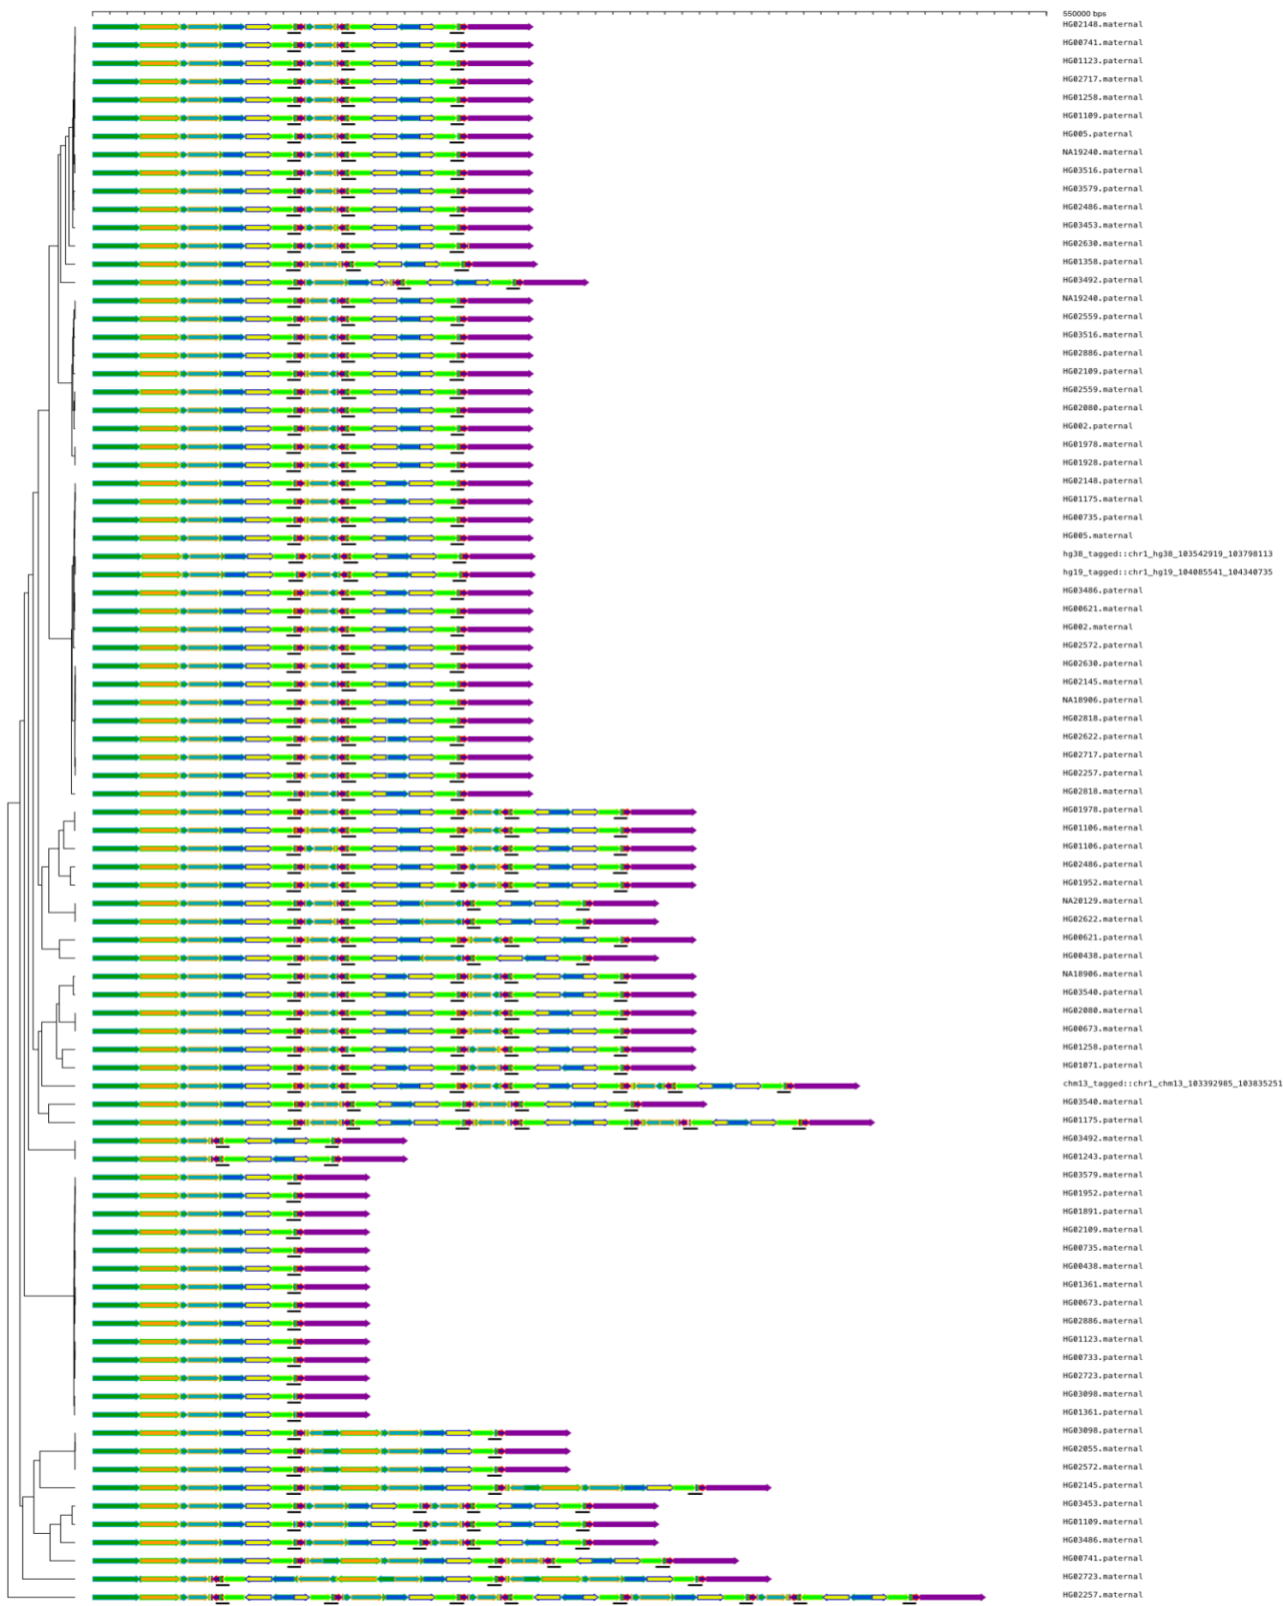

GIAB CMRG cases

Supplementary Figure 4

(a) LMF1

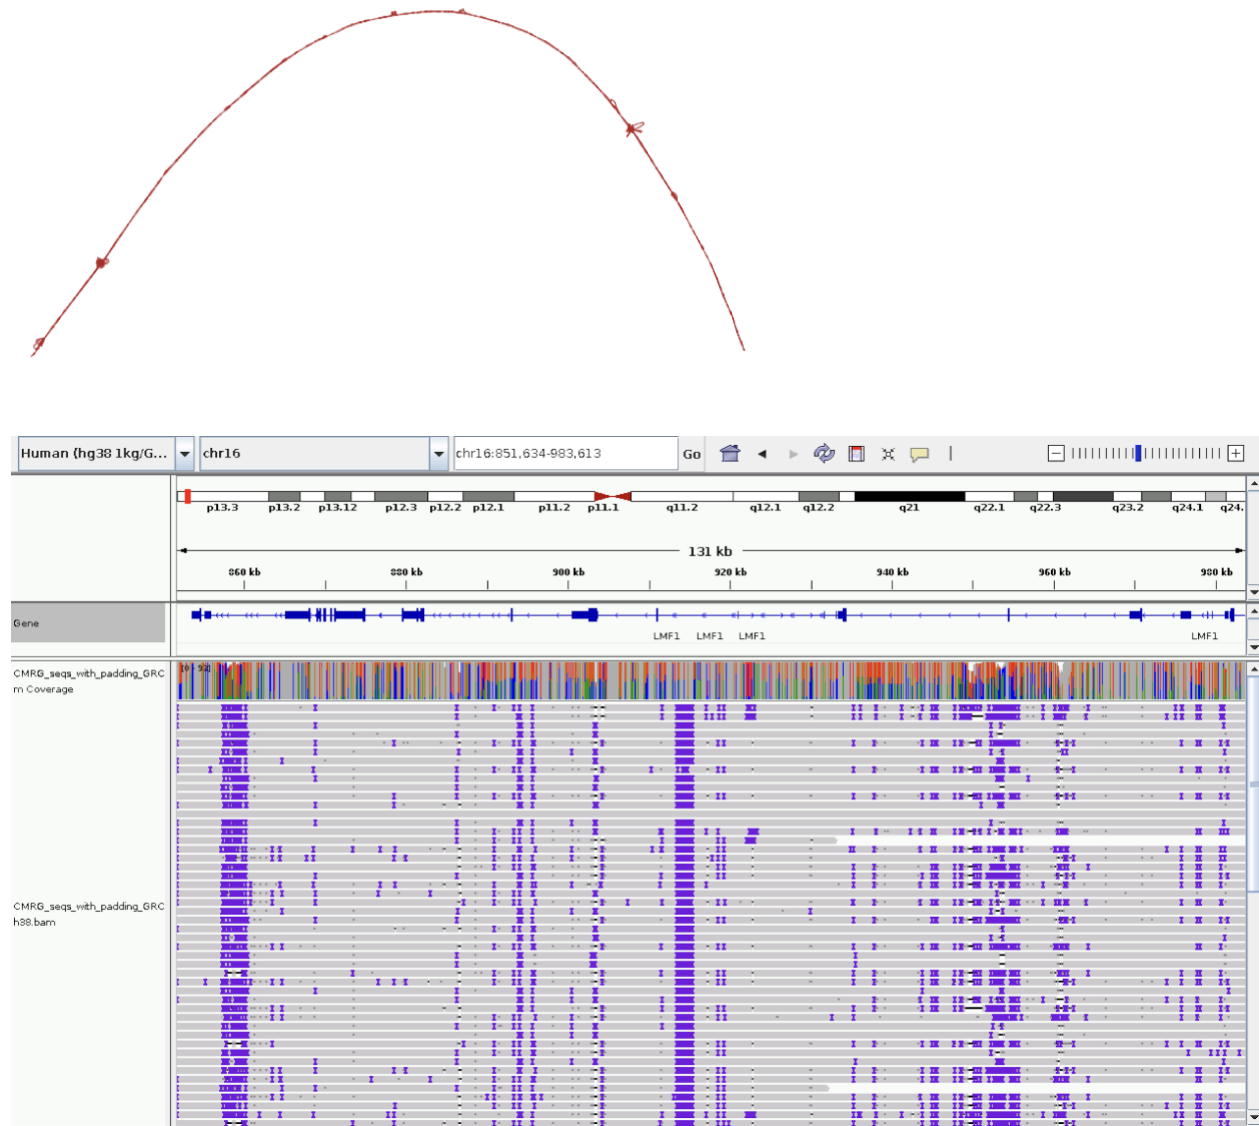

(b) Comparing the PAV structural variant calls indicated by the black auxiliary tracks to the principal bundle decomposition illustrates how the SV calls correspond to the changes in the principal bundles between each individual genome and the reference used for the SV call

(GRCh38, the top track).

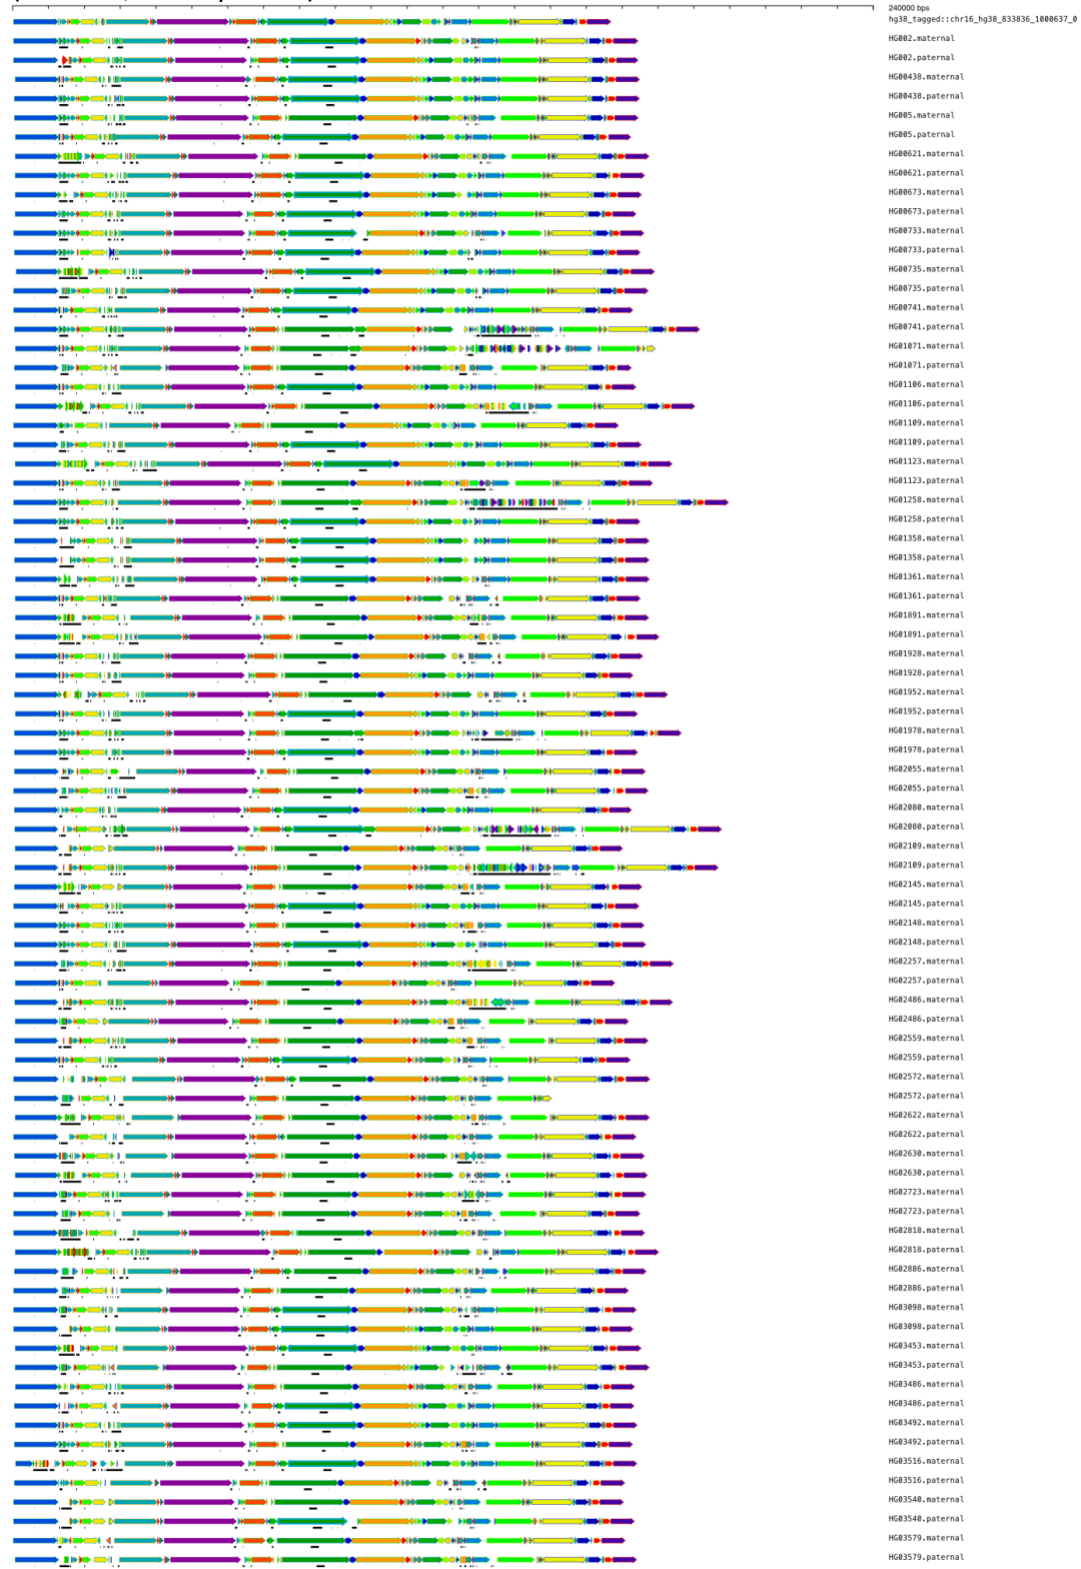

(b) ANKRD11

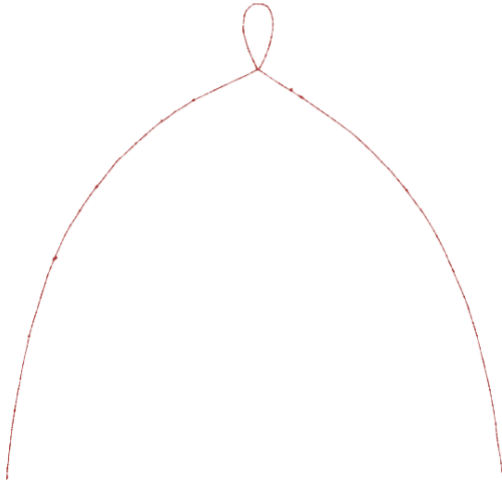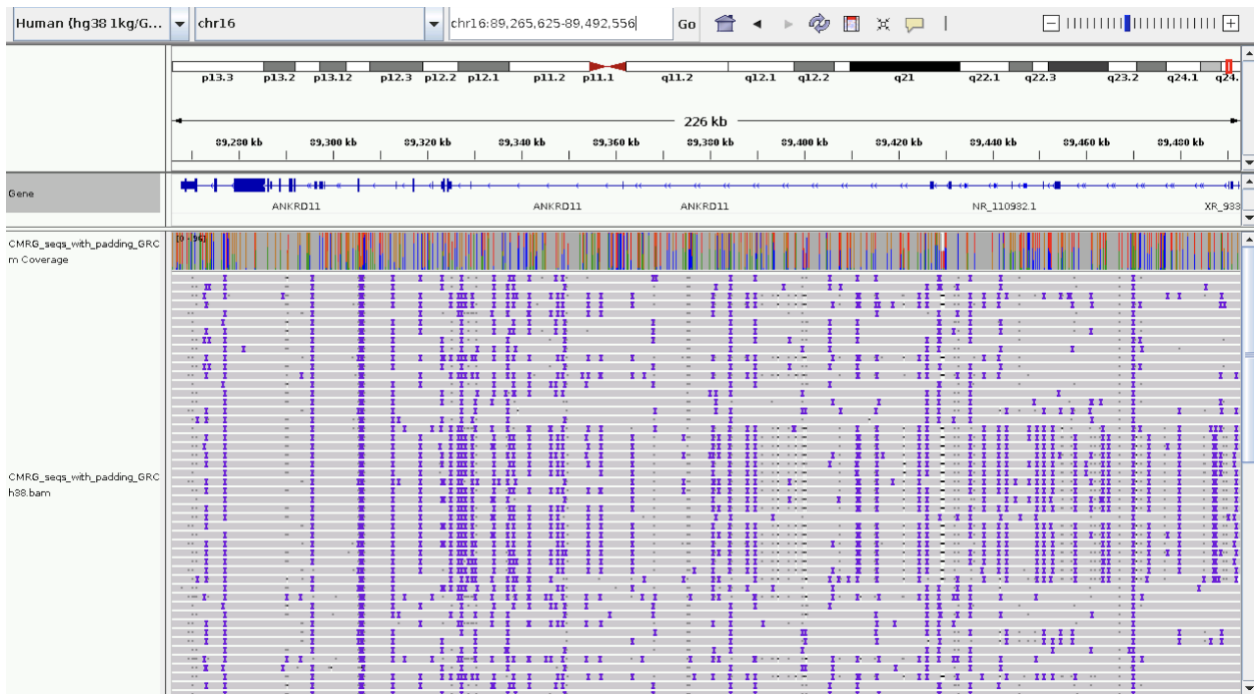

(c) SRGAP2

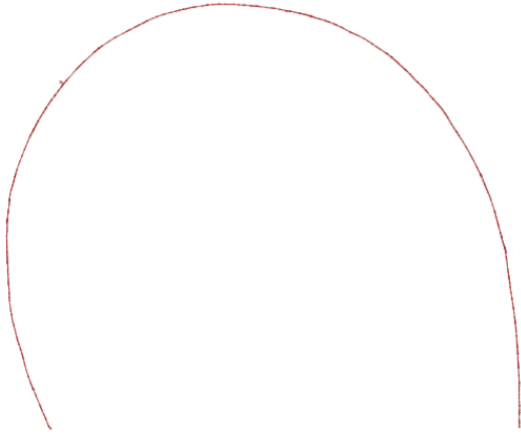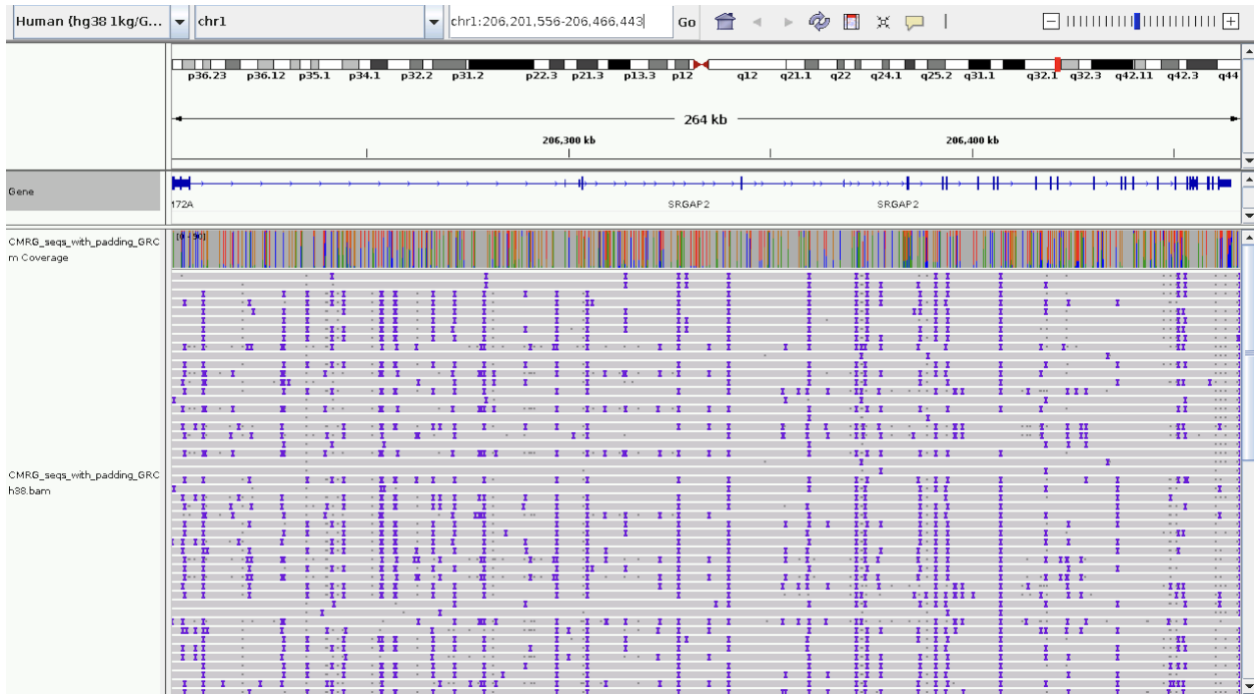



(d) KMT2C

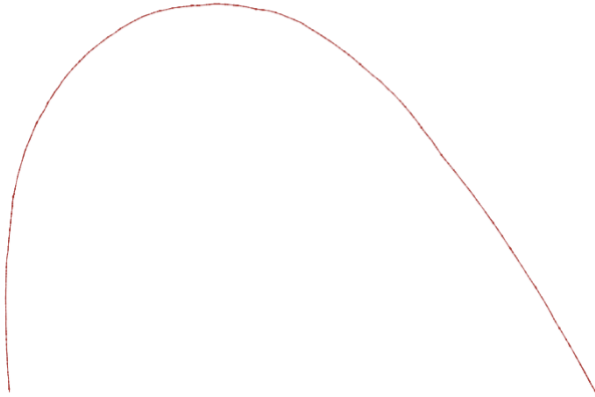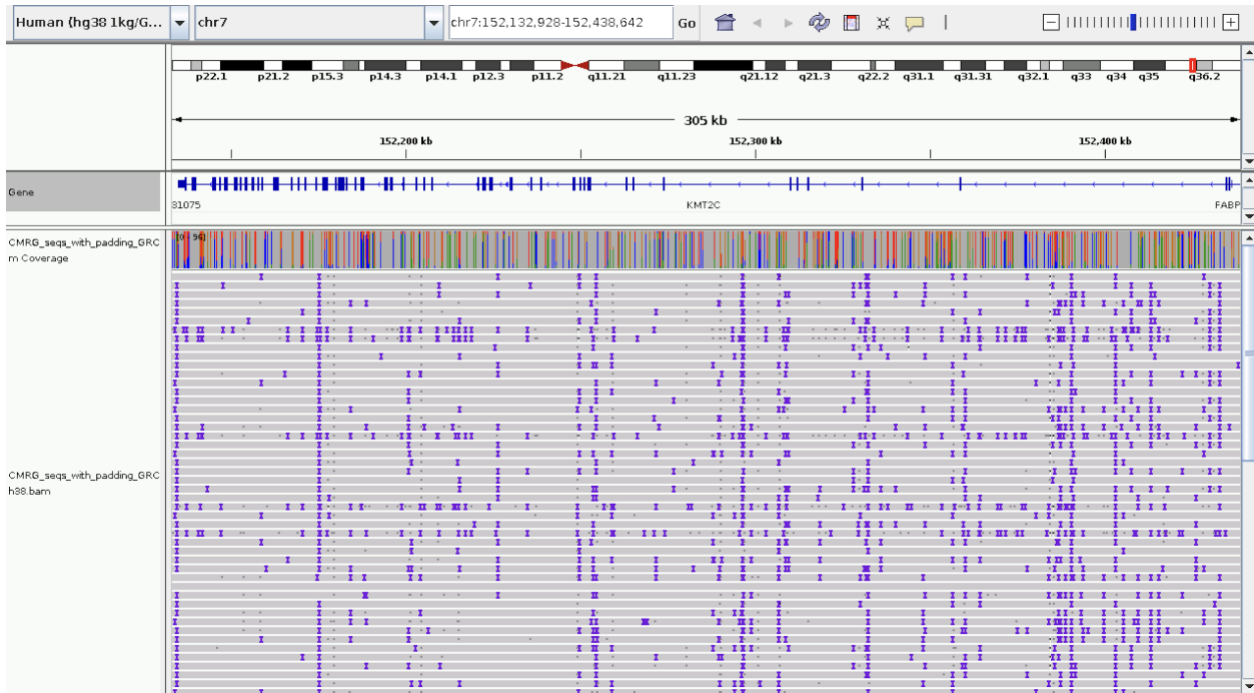

(e) LPA

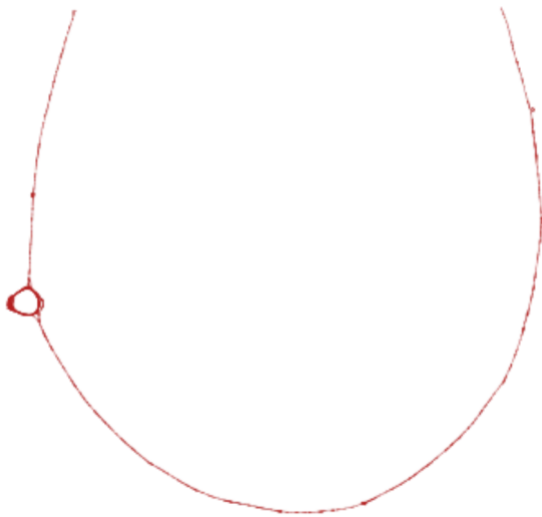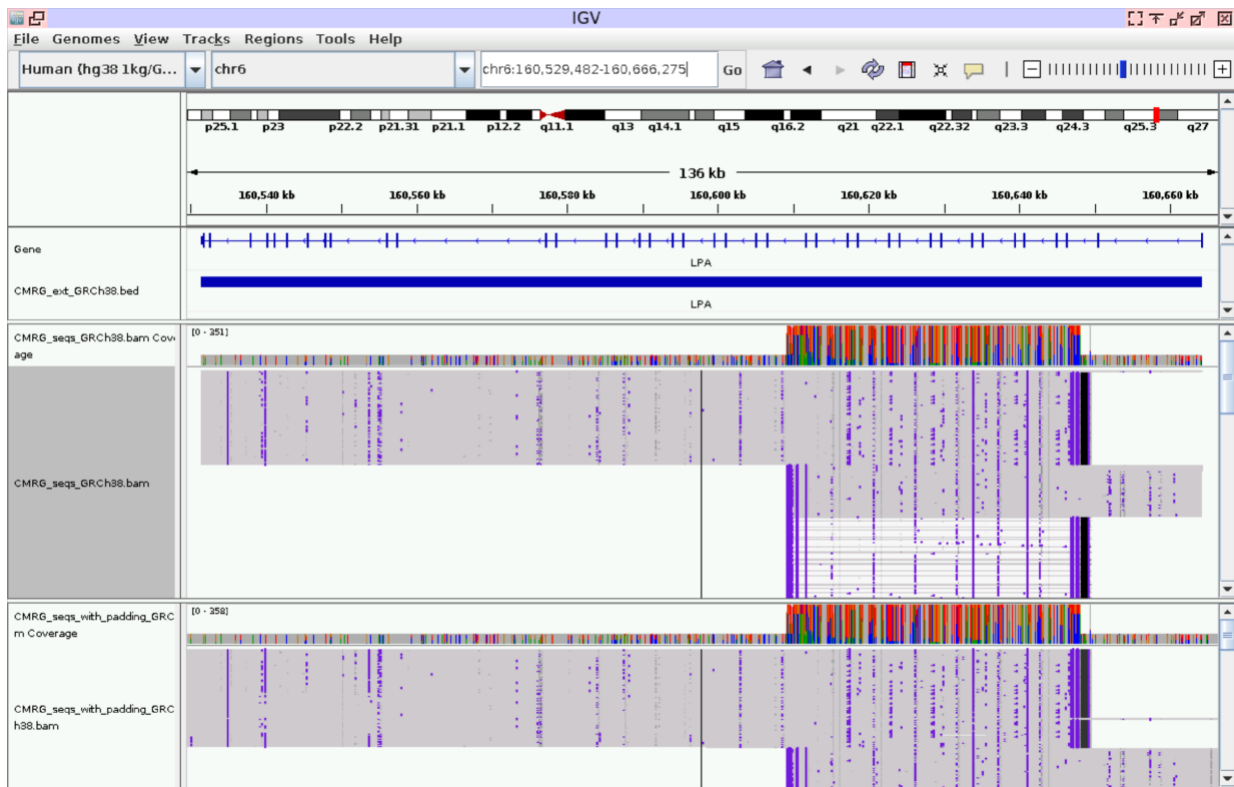

(f) MUC4

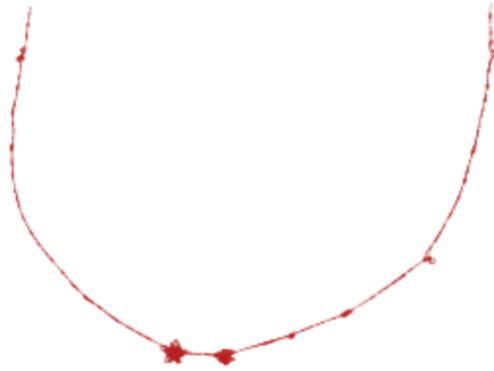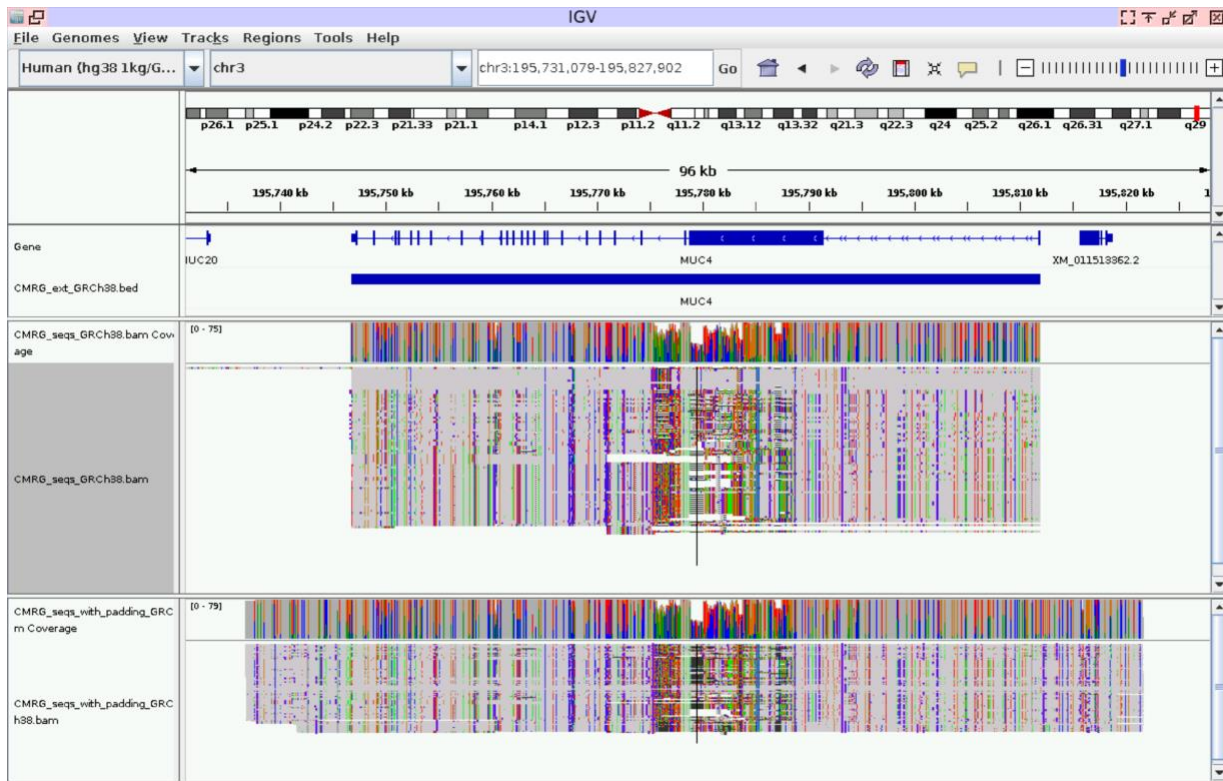

(g) MUC3A

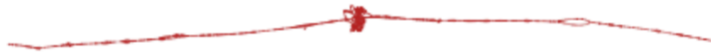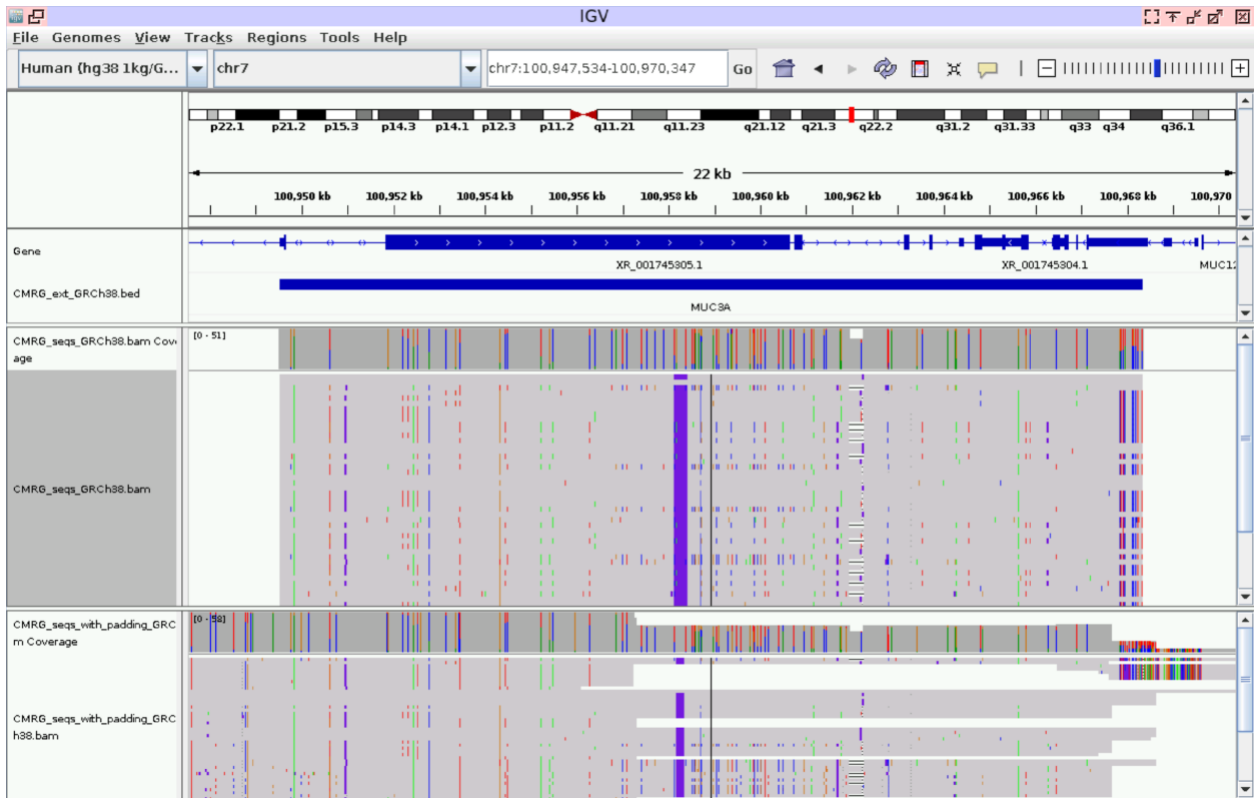

(h) KATNAL2

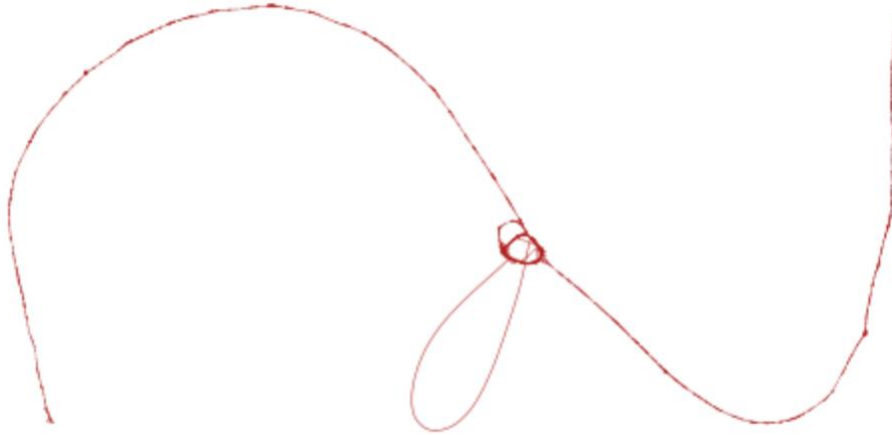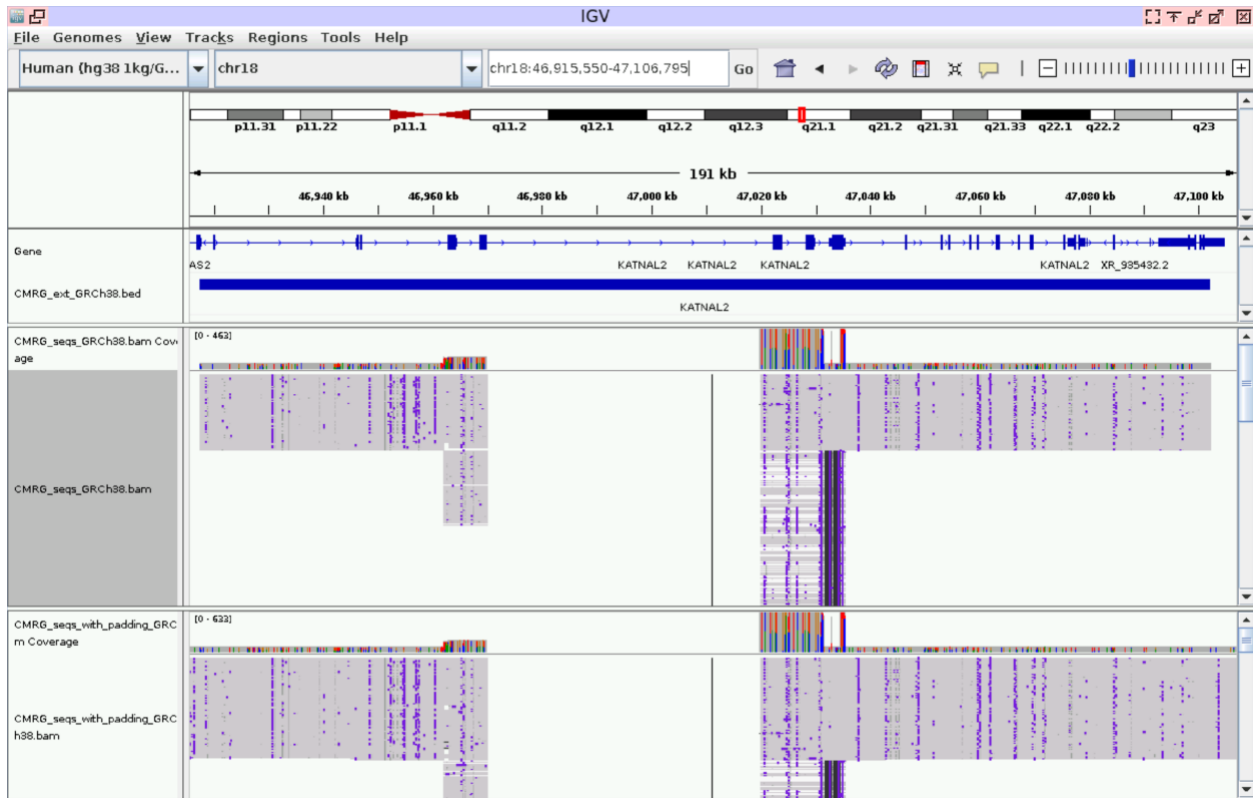

(i) FLG

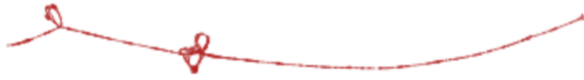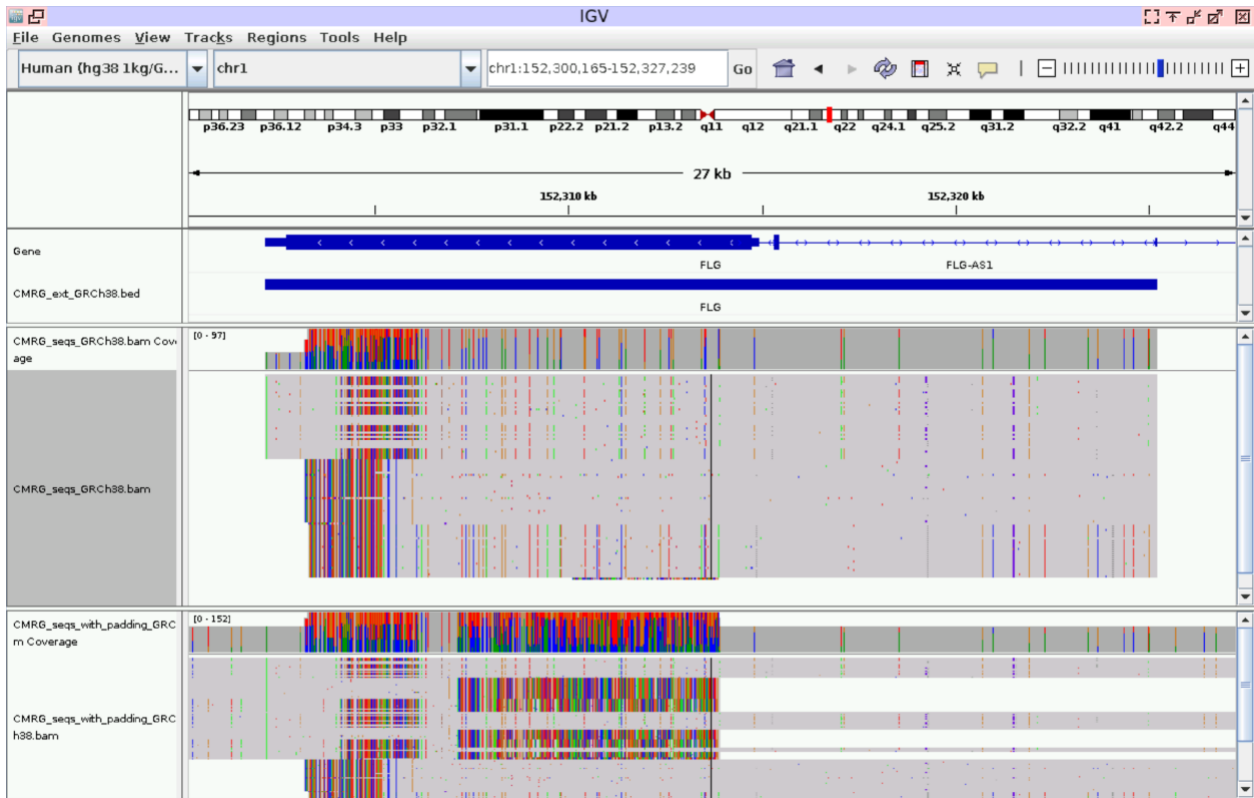

SNTG2 and KMT2

**Supplementary Figure 5**

**Supplementary Figure 5a**

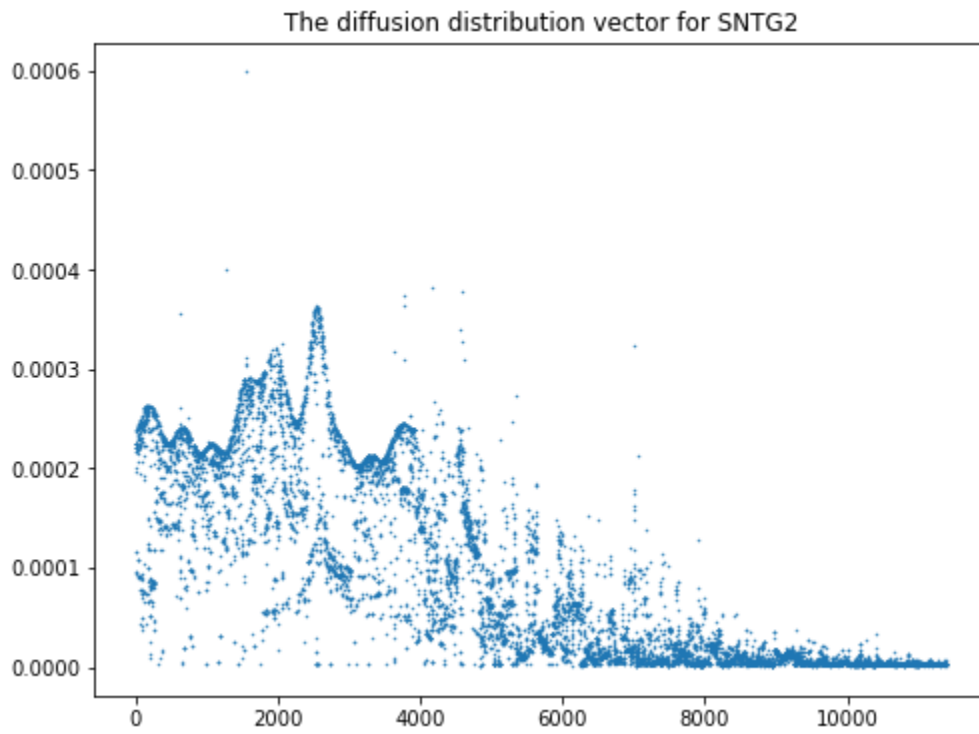

**Supplementary Figure 5b:** PCA plot for SNTG2 (Highest Entropy in the CMRG gene set)

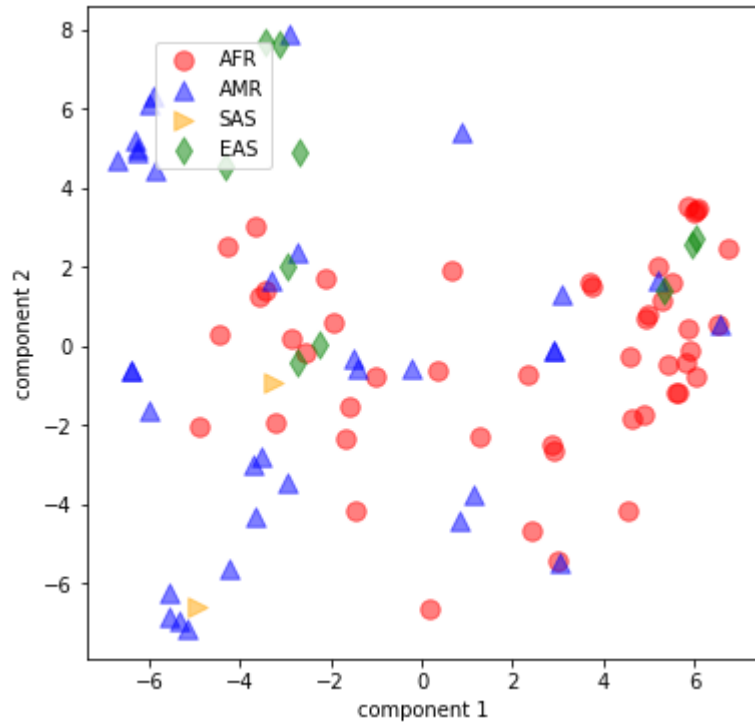

**Supplementary Figure 5c: PCA plot for KMT2C (Highest Entropy in the CMRG gene set)**

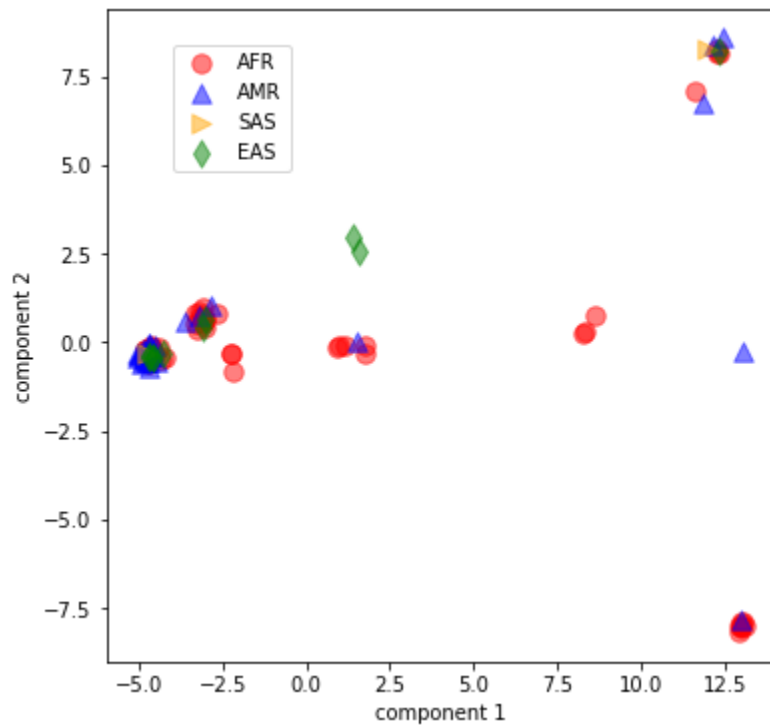



The distribution of the vertex weight on the principal bundle vertices for MHC class II, *AMY1A* and *LPA*

### Supplementary Figure 6

The distribution of the vertex weight on the principal bundle vertices and non-principal bundle vertices for the three cases MHC class II, *AMY1A* and *LPA* regions.

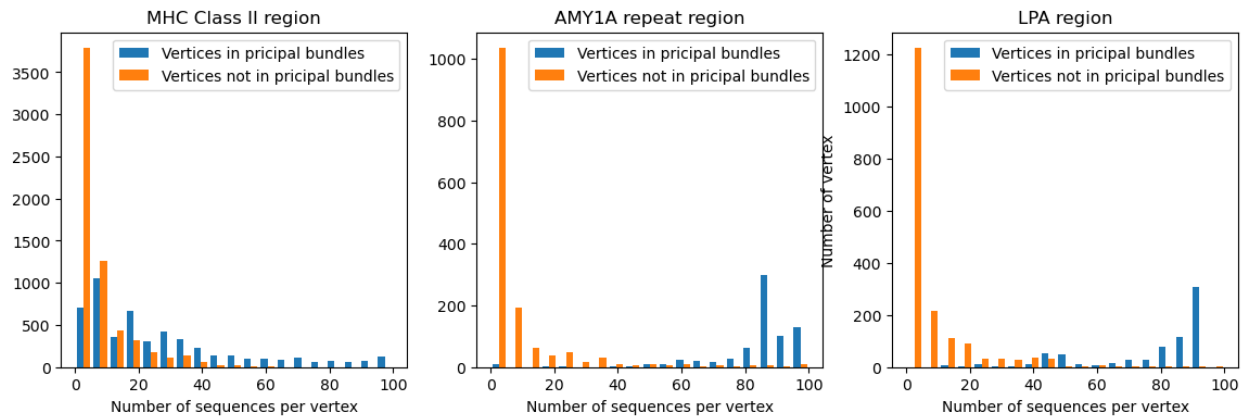

# LPA, KIV-II repeats principal bundle decomposition plot

## Supplementary Figure 7: LPA, KIV-II repeats principal bundle decomposition plot

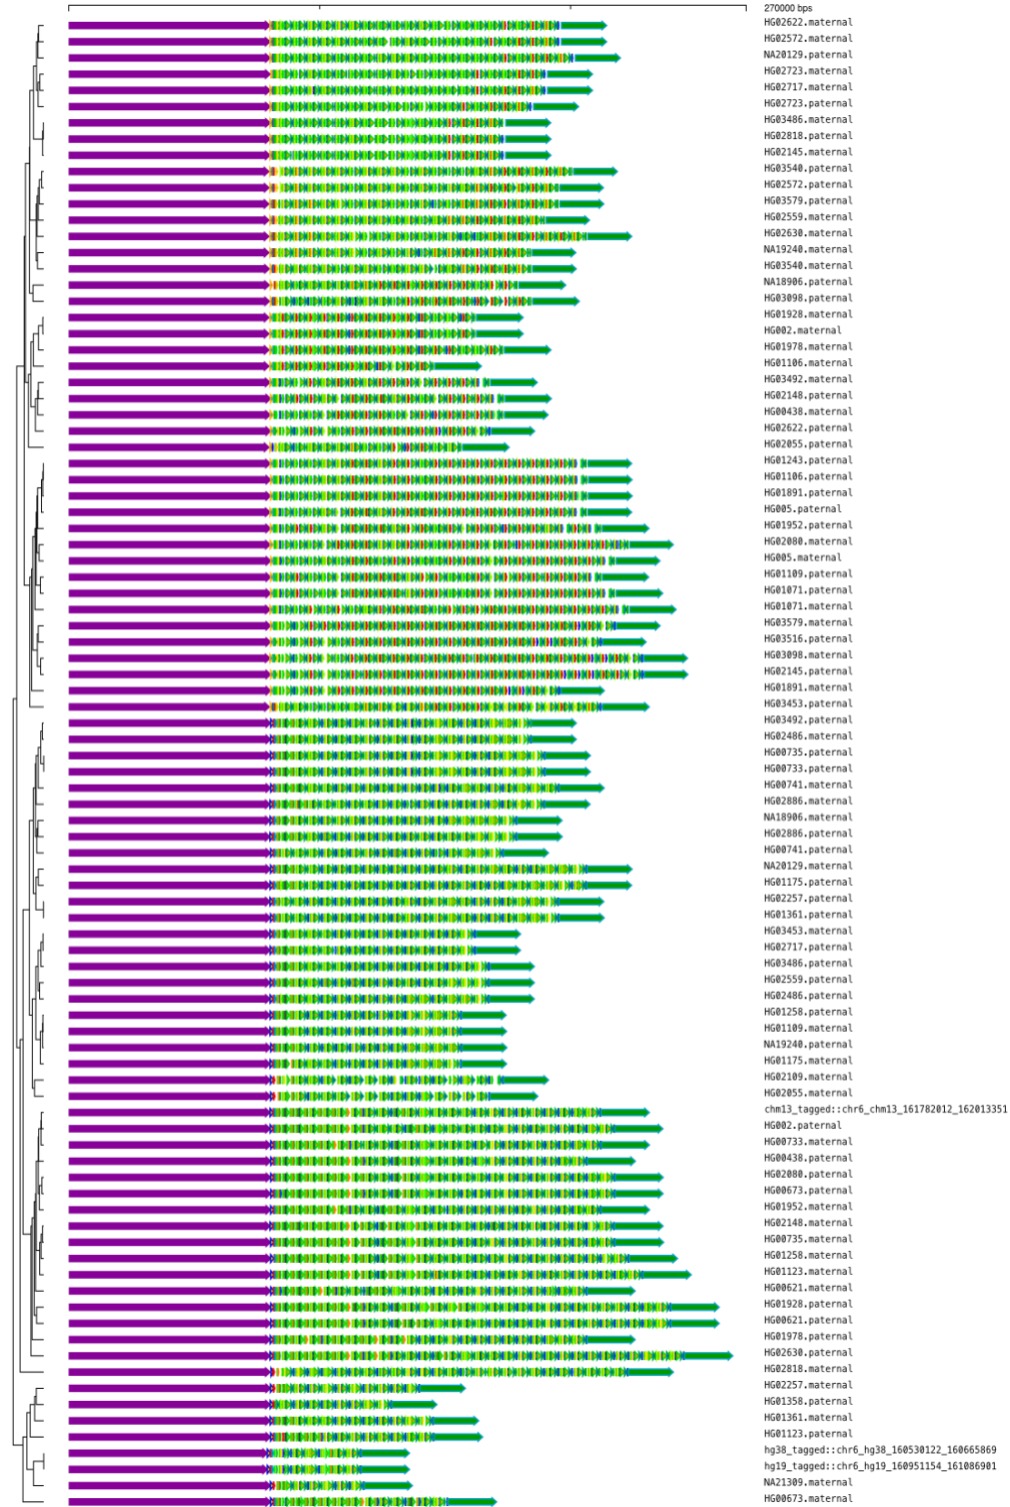

# Principal bundle plot for KATNAL2

## Supplementary Figure 8

Principal bundle plot for KATNAL2: GRCh38 chr18:46905550-47116795 showing different numbers of the repeat.

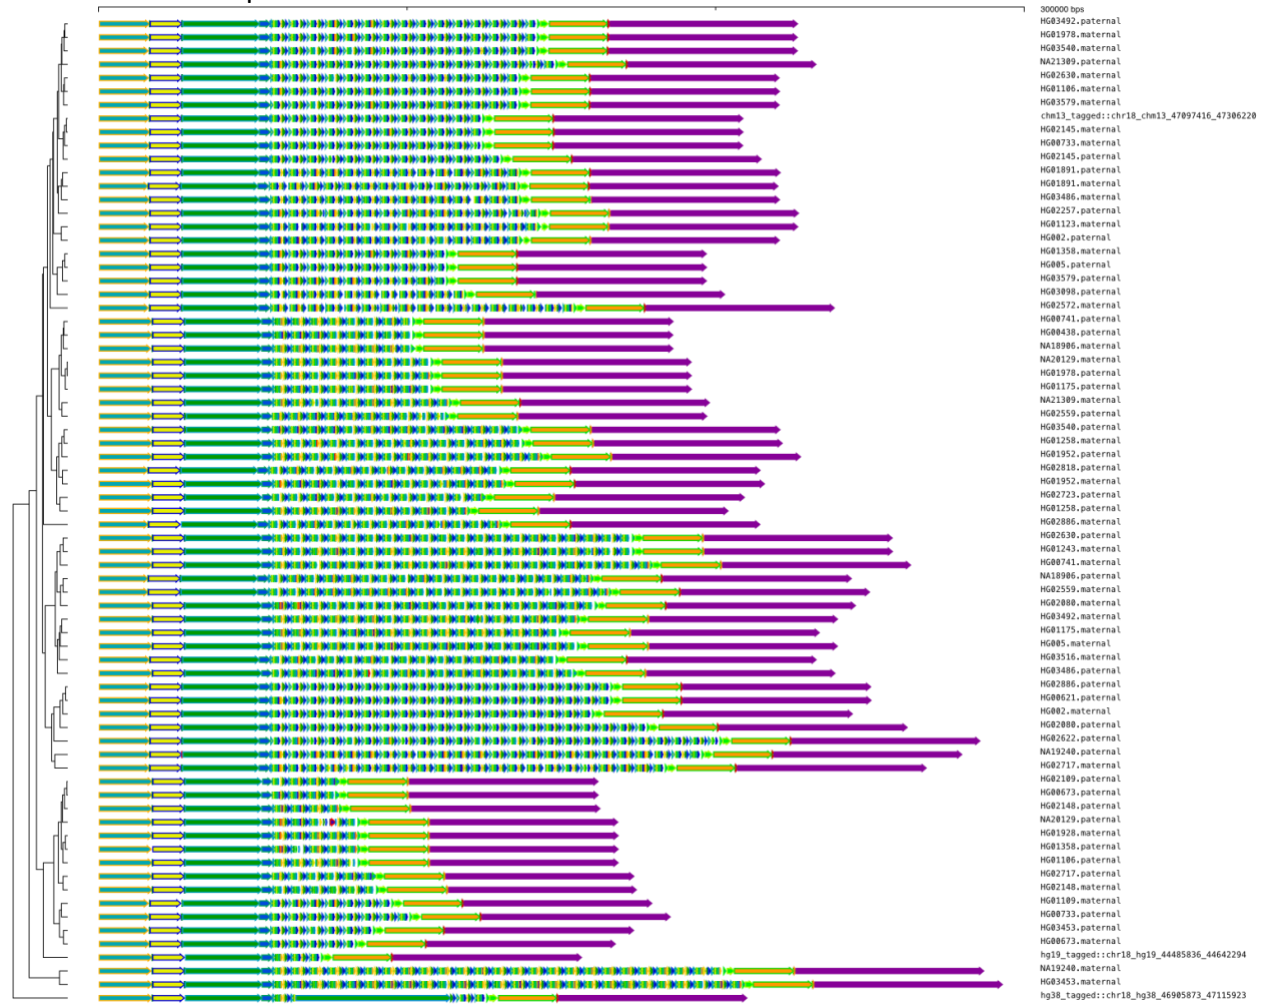

Supplement: 41592_2023_1914_MOESM1_ESM.pdf [file 41592_2023_1914_MOESM1_ESM.pdf]
